# 1 Chance and contingency in B cell 2 evolution limit the similarity of 3 antibody responses to infection 4 across individuals

5 Marcos C. Vieira<sup>1\*</sup>, Anna-Karin E. Palm<sup>2</sup>, Christopher T. Stamper<sup>3,4</sup>, Micah E.  
6 Tepora<sup>2</sup>, Khoa D. Nguyen<sup>5</sup>, Tho D. Pham<sup>5</sup>, Scott D. Boyd<sup>5</sup>, Patrick C. Wilson<sup>2,6</sup>,  
7 Sarah Cobey<sup>1\*</sup>

**\*For correspondence:**

mvieira@uchicago.edu (MCV);  
cobey@uchicago.edu (SC)

8 <sup>1</sup>Department of Ecology and Evolution, University of Chicago, Chicago, USA;  
9 <sup>2</sup>Department of Medicine, Section of Rheumatology, University of Chicago, Chicago,  
10 USA; <sup>3</sup>Center for Infectious Medicine, Department of Medicine Huddinge, Karolinska  
11 Institutet, Karolinska University Hospital Huddinge, Stockholm, Sweden; <sup>4</sup>Committee on  
12 Immunology, University of Chicago, Chicago, USA; <sup>5</sup>Department of Pathology, Stanford  
13 University School of Medicine, Stanford, USA; <sup>6</sup>Gale and Ira Drukier Institute for  
14 Children's Health, Weill Cornell Medicine, New York City, USA

---

15  
16 **Abstract** Antibody responses emerge from the competition of B cell lineages with different  
17 antigen receptors, each produced by the recombination of germline immunoglobulin genes.  
18 Which lineages win out can depend on subsequent somatic mutations that improve antigen  
19 binding, yet lineages using specific germline alleles can have higher affinity than others from the  
20 start or a higher propensity to adapt. How much do those germline-encoded advantages  
21 determine the outcome of B cell competition, potentially leading to predictable allele frequencies  
22 and sequence motifs in the response to the same antigen in different individuals? In simulations,  
23 we show that selection for receptors with germline-encoded specificity can lead to similar  
24 germline allele frequencies between individuals early in the response. As B cell lineages evolve,  
25 those early advantages are often overcome by lineages using different germline alleles in  
26 different individuals, leading to increasingly contingent patterns of germline allele usage over  
27 time. Consistent with simulations, mice experimentally infected with influenza virus have  
28 increasingly dissimilar germline allele frequencies and do not converge on similar CDR3  
29 sequences or similar somatic mutations. These results suggest germline-encoded specificities  
30 might be selected to enable fast recognition of specific antigens early in the response, while  
31 diverse evolutionary routes to high affinity limit the predictability of responses to infection and  
32 vaccination in the long term.

---

## 34 Introduction

35 Antibodies owe their diversity and potency to evolution on two different timescales. B cell recep-  
36 tors, the precursors of secreted antibodies, are encoded by immunoglobulin genes diversified over  
37 hundreds of millions of years (*Marchalonis et al., 1998; Flajnik, 2002; Das et al., 2008*). Recombi-  
38 nation of separate sets of genes encoding the receptor's heavy and light chains, combined with

39 insertions and deletions at the alleles' junctions, produces a unique receptor in each maturing B  
40 cell (**Hozumi and Tonegawa, 1976; Brack et al., 1978; Jackson et al., 2013**). The result is a diverse  
41 repertoire of naive (antigen-inexperienced) B cells collectively capable of binding virtually any anti-  
42 gen. Once activated, naive B cells expand into lineages that compete with each other for access to  
43 antigen and can undergo selection for somatic mutations that improve binding (**Eisen and Siskind,**  
44 **1964; Jacob et al., 1991; Vitorica and Nussenzweig, 2012**). How much the various lineages grow,  
45 what antigens and epitopes they target and how well they do so determine the ultimate specificity  
46 and potency of the antibody repertoire.

47 A central question in the study of adaptive immunity is how much these outcomes depend  
48 on the initial set of germline immunoglobulin genes versus the subsequent evolution of fully-  
49 formed B cell receptors. Affinity maturation can vastly improve binding (**Liao et al., 2013; McCarthy**  
50 **et al., 2019**), yet high affinity for particular epitopes can be "hardcoded" on individual germline al-  
51 leles from the start. These germline-encoded specificities might arise as evolutionary spandrels  
52 — byproducts of immunoglobulin gene diversification — (**Gould and Lewontin, 1979; Sangesland**  
53 **and Lingwood, 2021**), but they could be subsequently selected. For instance, germline alleles with  
54 innately high affinity for bacterial antigens might arise from long-term selection in vertebrate pop-  
55 ulations to recognize commonly encountered pathogens and commensals via broad classes of  
56 epitopes shared by these organisms (**Yeung et al., 2016; Collins and Jackson, 2018; Sangesland**  
57 **et al., 2020**).

58 Three lines of evidence support the idea that specific germline immunoglobulin alleles are bet-  
59 ter than others at binding particular antigens. First, structural characterization of individual anti-  
60 bodies shows that some variable (V) alleles can bind specific epitopes through germline-encoded  
61 motifs in complementarity-determining regions (CDRs) 1 and 2 (e.g., **West et al. 2012; Pappas et al.**  
62 **2014; Yeung et al. 2016; Yuan et al. 2020; Voss et al. 2021**). These antigen-binding regions are en-  
63 coded solely by the receptor's V allele, whereas CDR3 spans the junction of V alleles with joining (J)  
64 and, in the case of the heavy chain, diversity (D) alleles. While epistatic interactions with other al-  
65 leles might be important, germline-encoded motifs in CDRs1-2 could make specific V alleles more  
66 likely than others to bind specific antigens. A second line of evidence comes from experiments  
67 with transgenic mouse strains that each have a single heavy-chain V allele but multiple alleles in  
68 the other sets. Strains with specific V alleles have higher antibody titers against specific antigens  
69 than the other strains (**Sangesland et al., 2019, 2020**). A third line of evidence comes from se-  
70 quencing studies, which often show that specific alleles, allele combinations or CDR3 sequences  
71 are overrepresented in the response to particular epitopes (reviewed by **Dunand and Wilson 2015**  
72 and **Sangesland and Lingwood 2021**). Overrepresentation of specific alleles is often interpreted as  
73 a consequence of, and as indirect evidence for, the kind of germline-encoded specificity revealed  
74 by structural analyses or transgenic mouse experiments. In addition to different propensities to  
75 encode receptors with high affinity, overrepresentation of particular alleles might also reflect dif-  
76 ferent potentials for subsequent adaptation during affinity maturation.

77 Yet the degree to which specific germline alleles are consistently overrepresented in individuals  
78 exposed to the same antigen varies widely for reasons that are poorly understood. In some cases,  
79 only a few germline alleles are represented in the response (e.g., **Crews et al. 1981; Cumano and**  
80 **Rajewsky 1985, 1986; Guthmiller et al. 2021, 2022**), suggesting that germline-encoded specificities  
81 strongly predict the outcome of B cell competition and lead to highly similar repertoires. In other  
82 cases, most germline alleles are used (e.g. **Di Niro et al. 2015; Kuraoka et al. 2016; Nielsen et al.**  
83 **2020; Robbiani et al. 2020; Sakharkar et al. 2021**), only some of which appear overrepresented with  
84 respect to controls, suggesting that initial advantages of B cells with specific germline alleles do not  
85 strongly predict the outcome of B cell evolution and competition. Those studies vary not only in  
86 the complexity of the antigen and the type of B cell studied, but also in the amount of time since  
87 the exposure and thus the extent of affinity maturation. How the overrepresentation of specific  
88 alleles and the degree of similarity between individuals changes during the course of the response  
89 has not been systematically investigated.

90 Using simulations and experiments, we show that stochasticity and contingency in B cell evo-  
91 lution and competition counterbalance initial selection for receptors with specific germline alleles.  
92 Germline alleles can give B cell lineages an advantage over others early in the response, but which  
93 lineages ultimately dominate also depends on factors that are largely random with respect to the  
94 choice of germline allele, such as the occurrence and timing of mutations in different lineages. In  
95 simulations, these factors tend to produce increasingly contingent patterns of allele usage during  
96 the course of the response. We find patterns consistent with those dynamics in the B cell response  
97 of mice experimentally infected with influenza virus. Specific heavy-chain V alleles are consistently  
98 abundant in the repertoires of different infected mice early on, but allele usage becomes less con-  
99 sistent over time as large mutated lineages come to dominate the repertoire. Those dominant lin-  
100 eages use different germline V alleles in different mice, and lineages sharing the same allele rarely  
101 evolve the same somatic mutations. These results suggest that germline-encoded specificities and  
102 those evolved later by affinity maturation are important at different phases of the response. Se-  
103 lection to reinforce germline-encoded specificities in the long-term evolution of jawed vertebrates  
104 might be driven by the fitness benefits of responding rapidly to commonly encountered pathogens.  
105 The lack of consistency in germline allele usage or specific mutations later in the response also sug-  
106 gests no pronounced differences in the adaptability of different immunoglobulin genes.

## 107 Results

108 We begin by asking what factors might affect germline allele frequencies in the B cell response,  
109 before turning to a mathematical model to understand how those factors interact. By response  
110 we mean the set of B cell populations that bind a specific epitope, antigen or pathogen: germi-  
111 nal center cells, memory cells and short- and long-lived plasma cells. Since all those populations  
112 descend from naive B cells, germline allele frequencies in the response depend partly on allele  
113 frequencies in the naive repertoire, which vary widely between alleles but tend to be positively  
114 correlated between individuals (although heritable variation exists; **Glanville et al. 2011; Watson  
115 et al. 2017; Collins et al. 2020**). Here, we focus on factors that cause some alleles to be over or  
116 underrepresented in the response relative to their baseline frequency in naive B cells. How much  
117 a germline allele increases or decreases in frequency depends on how many naive B cells using  
118 that allele are activated, and how much they divide inside or outside germinal centers, relative to  
119 naive cells using other alleles. Within specific cell types, germline allele frequencies also reflect  
120 how often cells using each allele differentiate into each cell type. We start by focusing on germline  
121 allele frequencies in the response as a whole, across cell types.

122 There are two non-mutually exclusive reasons why the total number and size of B cell lineages  
123 involved in the response might vary between germline immunoglobulin alleles (**Figure 1**). The first  
124 is if using particular germline alleles tends to give B cell lineages an advantage over others. This  
125 advantage could be a higher initial affinity, a greater capacity to evolve high affinity during affinity  
126 maturation, or both:

127 *Germline-encoded affinity.* Since affinity is a property of the entire recombined receptor, not  
128 of its individual constituent alleles, naive B cells using a particular germline allele have a dis-  
129 tribution of possible affinities depending on the choice of alleles from the other sets in the  
130 heavy and light chains (including insertions and deletions at the alleles' junctions). If individ-  
131 uals have similar sets of germline alleles at similar frequencies in the naive repertoire, and if  
132 the probabilities of different allele combinations are similar, then the affinity distribution for  
133 any given germline allele will be similar in different individuals. Yet different germline alleles  
134 might have different affinity distributions, leading to different fitness distributions for naive  
135 B cells using each allele. For instance, naive B cells using a specific heavy-chain V allele might  
136 bind the antigen well across all combinations with other alleles via CDRs1-2 (**Figure 1**, orange  
137 allele), while naive B cells using a different V allele may bind poorly across the board (**Figure 1**,  
138 purple allele) or have low affinity overall but high affinity in certain combinations (**Figure 1**,

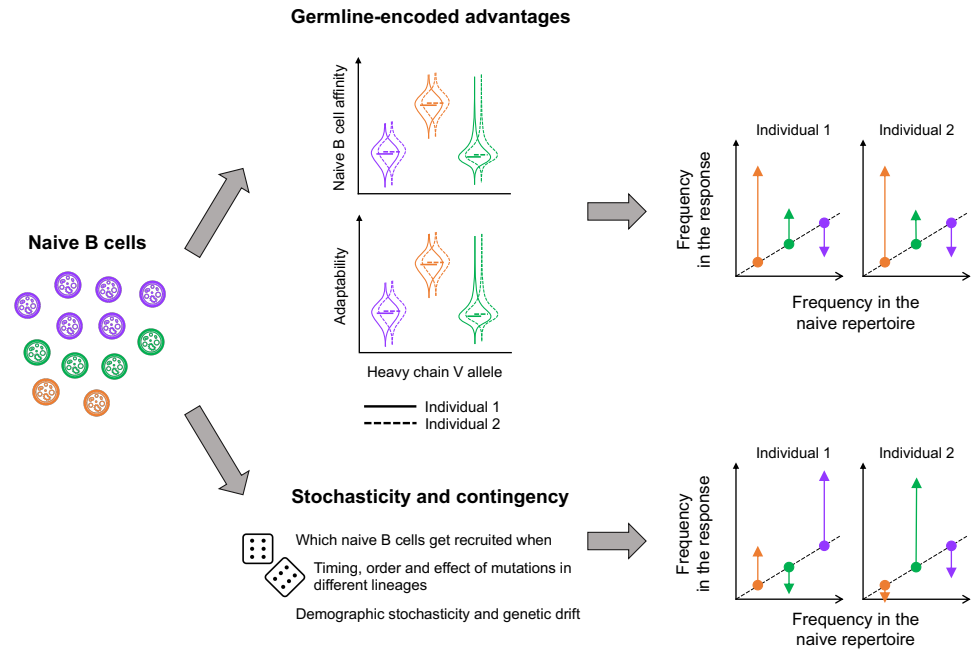

**Figure 1.** Schematic of factors controlling germline allele frequencies in the B cell response to a particular antigen. Three heavy-chain V alleles (orange, purple and green) are present at different frequencies in naive B cells. Although they have the same heavy-chain V allele, naive cells of the same color can have different alleles from the other sets in the heavy and light chains (and different insertions and deletions at the alleles' junctions). Different combinations produce receptors with different affinities for the antigen and different propensities for adaptation during affinity maturation. If these distributions vary between heavy-chain V alleles, alleles more likely to produce receptors with high affinity or high adaptability will tend to increase in frequency relative to the naive repertoire. These deviations are expected to be consistent in individuals sharing similar sets of germline alleles at similar frequencies in the naive repertoire. However, which B cell lineages dominate the response – and what heavy-chain V alleles they happen to use – is also contingent on events that are largely unpredictable, potentially leading to uncorrelated frequency deviations in the response of different individuals.

139 green allele).

140 *Germline-encoded adaptability.* Like initial affinity for a particular antigen, the potential for a  
 141 B cell receptor to evolve higher affinity is a property of the entire receptor, not of individual  
 142 germline alleles. Yet receptors using different alleles might have different propensities to  
 143 adapt (**Figure 1**), for instance if they tend to have different rates of beneficial and deleterious  
 144 mutations. Variation in mutability occurs because the enzymes responsible for mutating the  
 145 B cell receptor target different nucleotide motifs at different rates (**Rogozin and Kolchanov,**  
 146 **1992; Rogozin and Diaz, 2004; Yaari et al., 2013; Wei et al., 2015**), so variation in the motif  
 147 composition of germline immunoglobulin alleles can lead to differences in the frequency and  
 148 distribution of mutations. Variation in the relative probabilities of beneficial and deleterious  
 149 mutations arises from epistasis: mutations are more likely to change affinity or disrupt the  
 150 receptor's function in some backgrounds than in others (**Boyer et al., 2016; Schulz et al.,**  
 151 **2021**).

152 A second reason why specific germline alleles might become over or underrepresented is the  
 153 role of chance and contingency in B cell activation, evolution and competition. Contingency means  
 154 that although these processes are not random (since they are shaped by selection for affinity), their  
 155 precise outcome depends on the occurrence, order and timing of events that are largely unpre-  
 156 dictable (**Gould, 1989; Beatty and Carrera, 2011; Blount et al., 2018**). Which lineages come to dom-

**Table 1.** Default parameter values used in simulations.

| Parameter                                            | Symbol             | Value                                    |
|------------------------------------------------------|--------------------|------------------------------------------|
| Baseline average naive B cell affinity               | $a$                | 1                                        |
| Baseline standard deviation of naive B cell affinity | $\sigma$           | 1                                        |
| Expected number of lineages seeding each GC          | $I_{\text{total}}$ | 200                                      |
| GC carrying capacity                                 | $K$                | 2000                                     |
| Duration of GC immigration phase                     | $t_{\text{imm}}$   | 6 days                                   |
| Maximum rate of cell division                        | $\mu_{\text{max}}$ | 3 cell <sup>-1</sup> day <sup>-1</sup>   |
| Death rate                                           | $\delta$           | 0.2 cell <sup>-1</sup> day <sup>-1</sup> |
| Standard deviation of mutation effect size           | $\beta$            | 4                                        |

157 inate the response, and which germline alleles they use, will be contingent on how those events  
158 play out. Several sources of stochasticity in B cell dynamics could lead to contingent germline allele  
159 frequencies:

160 *Stochasticity in B cell activation and in the colonization of germinal centers.*

161 Because the number of naive B cells is finite and the probabilities of different VDJ combina-  
162 tions vary by orders of magnitude (**Elhanati et al., 2015**), rare germline allele combinations  
163 with high affinity may be present in the naive repertoires of some individuals but not others.  
164 Even if present in most individuals, low-frequency, high-affinity germline-allele combinations  
165 might, simply by chance, be recruited only in some of them (for instance, if none of the rare  
166 naive cells come near the site of the response in a given individual).

167 Since germinal centers have a limited size, lineages that happen to arrive first might prevent  
168 others from establishing in the germinal center (similar to species competing for access to a  
169 site; **Chase 2003; Fukami 2015**). Whether such “priority effect” does occur in germinal centers  
170 is unknown.

171 *Stochasticity in the timing, order and effect of mutations.* Which lineages ultimately evolve the  
172 highest affinity and outcompete the others is contingent on the precise timing, order and  
173 effect of mutations in each lineage. For instance, the timing and effect of mutations affect  
174 the outcome of clonal interference – when multiple affinity-increasing mutations within a  
175 lineage or in different lineages compete for fixation (**Desai and Fisher, 2007**). Due to epistasis,  
176 the same B cell lineage could end up with very different affinities by acquiring mutations in  
177 different orders (**Starr and Thornton, 2016**).

178 *Demographic stochasticity and genetic drift.* Demographic stochasticity and genetic drift might  
179 be important, especially early in the response when population sizes are small. Demographic  
180 stochasticity might tip the balance of competition between lineages, driving some to extinc-  
181 tion purely by chance. Genetic drift might cause new mutations to be fixed within a lineage  
182 even if they are neutral or deleterious or become extinct even if they are beneficial. The loss  
183 of newly arisen beneficial mutations due to drift is important even in large populations.

184 While both contingency and germline-encoded advantages can cause germline alleles to in-  
185 crease in frequency relative to the naive repertoire, only the latter are expected to produce con-  
186 sistent deviations in the response of different individuals exposed to the same antigen (provided  
187 individuals have similar sets of germline alleles) (**Figure 1**). The correlation in frequency deviations  
188 between individuals can therefore be used to measure how strongly germline-encoded advantages  
189 shape the outcome of B cell competition and evolution.

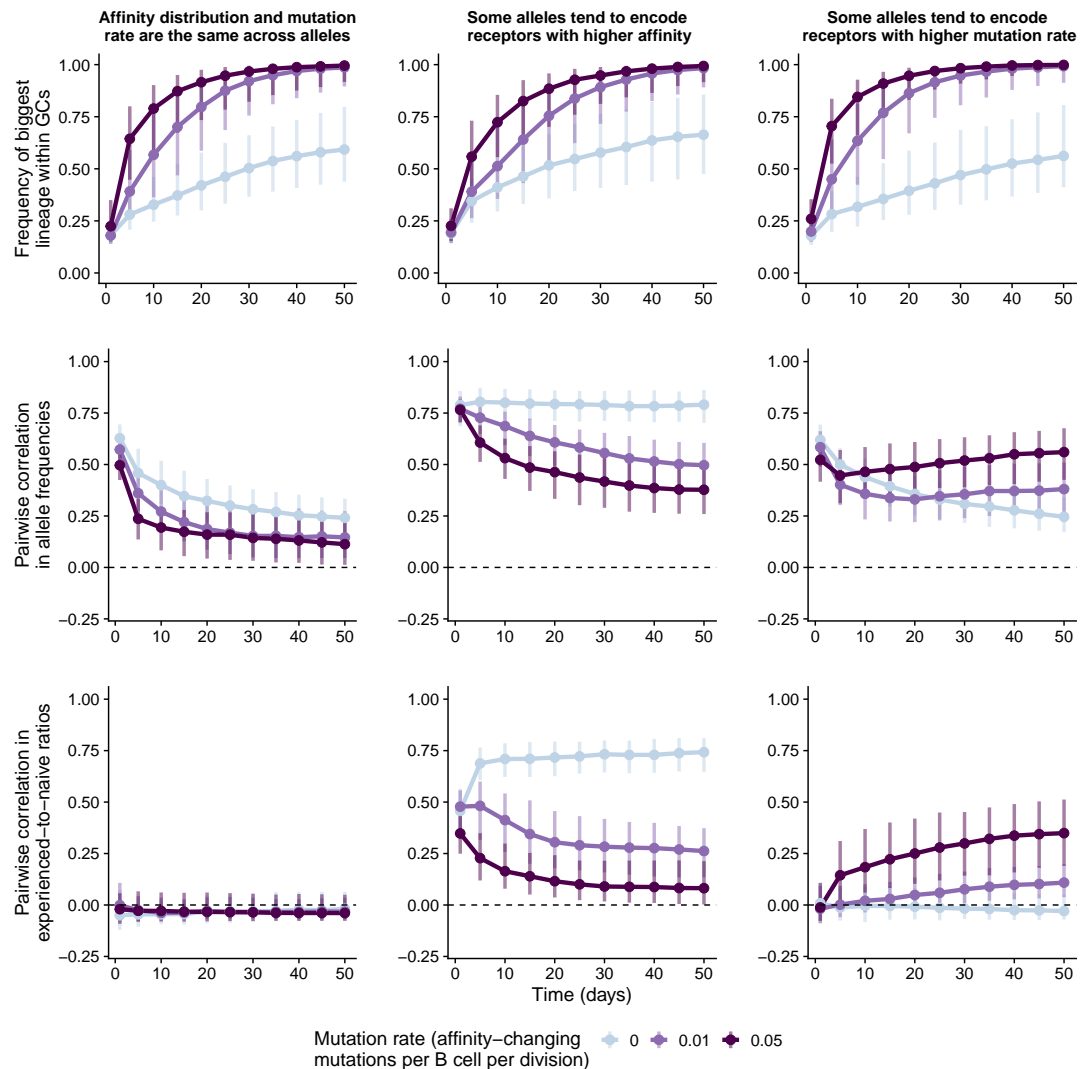

**Figure 2.** Evolution of allele frequencies in the B cell response simulated under different scenarios. For each scenario, we simulated 20 individuals, each with 15 germinal centers. We track the frequency of the biggest B cell lineage within each germinal center (top row) and between-individual correlations in allele frequencies (middle row) and in frequency deviations relative to the naive repertoire (bottom row). Points and vertical bars represent the median and the 1st and 4th quartiles, respectively. Values of parameters shared across scenarios are shown in Table 1. High-affinity alleles have naive affinity distributions with a mean increased by  $s = 1.5$  relative to other alleles. High-mutation alleles have the baseline mutation rate multiplied by  $\gamma = 6$ .

**Figure 2-Figure supplement 1.** Simulations under the equivalent-alleles scenario.

**Figure 2-Figure supplement 2.** Simulations under the high-affinity scenario.

**Figure 2-Figure supplement 3.** Frequency of high-affinity alleles within simulated germinal centers.

**Figure 2-Figure supplement 4.** Simulations under high-mutability scenario.

**Figure 2-Figure supplement 5.** Combined frequency of high-mutability alleles.

**Figure 2-Figure supplement 6.** Sensitivity to the choice of correlation coefficient.

190 **Similarity in germline allele frequencies reflects a balance between contingency**  
 191 **and germline-encoded advantages**

192 To understand how germline-encoded advantages interact with chance and contingency to shape  
 193 the B cell repertoire, we used a stochastic mathematical model to simulate B cell evolution and  
 194 competition in germinal centers (Methods: “Model of B cell dynamics”; Table 1). Rather than mak-  
 195 ing quantitative predictions based on realistic parameter values, our goal was to investigate the

196 qualitative behavior of germline allele frequencies in the response and their deviations from the  
197 naive repertoire under different scenarios. The model focuses on the subset of the B cell response  
198 derived from germinal centers (the canonical sites of somatic hypermutation and B cell evolution),  
199 without considering extrafollicular B cell populations that expand outside of germinal centers (al-  
200 though reports of selection and somatic hypermutation in those populations suggest they might  
201 have similar dynamics; *Di Niro et al. 2015; Elsner and Shlomchik 2020*). To simulate selection for  
202 affinity, B cells are stochastically sampled to immigrate or divide based on their affinity relative  
203 to other cells in the naive repertoire (in the case of immigration) or in the germinal center (in the  
204 case of division). Dividing B cells then undergo affinity-changing mutations with some probability.  
205 To represent variation in germline-encoded affinity and adaptability, B cells using different heavy  
206 chain germline V alleles can have different naive affinity distributions. The variation within each  
207 distribution in turn represents the effects of stochasticity in VDJ recombination. The model also  
208 allows different germline V alleles to have different mutation rates, representing one aspect of  
209 variation in adaptability. We simulated 20 individuals, each with 15 germinal centers. We based  
210 these simulated individuals on mice for which we empirically estimated the set of heavy chain V  
211 alleles and their frequencies in the naive repertoire. These mice typically had about 75 heavy-chain  
212 V alleles (60-70 of which were typically shared between a pair of mice), and allele frequencies in  
213 the naive repertoire were strongly correlated between mice (**Figure 3A-B**).

214 If all germline alleles have the same naive affinity distribution and the same mutation rate,  
215 the model predicts that allele frequencies will be positively correlated between individuals early  
216 in the response but less so over time (**Figure 2**, left column; **Figure 2-Figure Supplement 1**). The  
217 positive correlation early on arises from the correlation in naive allele frequencies between individ-  
218 uals: Assuming identical affinity distributions between germline alleles, the alleles tend to arrive  
219 in germinal centers in the same frequencies in which they occur in the naive repertoire. The sub-  
220 sequent decrease in allele-frequency correlations reflects the increasing role of stochasticity and  
221 contingency. Over time, due to selection, each germinal center tends to become dominated by  
222 the lineage with the highest affinity (**Figure 2**, left column, top row). With no differences in affinity  
223 or adaptability between germline alleles, which lineages ultimately evolve the highest affinity is  
224 completely random with respect to the choice of germline allele, and so allele-frequency correla-  
225 tions between individuals decrease while deviations from the naive repertoire (measured as the  
226 ratio between experienced and naive frequencies) remain uncorrelated throughout the response  
227 (**Figure 2**, left column, bottom row).

228 If some germline alleles tend to encode receptors with higher affinity than others, the model  
229 predicts that both allele frequencies and their deviations from the naive repertoire will be positively  
230 correlated between individuals early in the response, but chance and contingency reduce this cor-  
231 relation over time (**Figure 2**, middle column; **Figure 2-Figure Supplement 2**). Without somatic hy-  
232 permutation, both types of correlation remain high over time as germinal centers are consistently  
233 dominated by B cell lineages using high-affinity alleles (**Figure 2-Figure Supplement 3**). As the rate  
234 or the effect size of somatic hypermutation increases, so does the opportunity for B cell lineages  
235 using low-affinity alleles to overcome the initial advantage of those using high-affinity alleles (**Fig-  
236 ure 2-Figure Supplement 3**). In the model, precisely which low-affinity alleles are used by lineages  
237 that do so is a matter of chance, since all B cells have the same probability of acquiring benefi-  
238 cial mutations irrespective of the germline V allele they use. As a result, both types of correlation  
239 between individuals decrease over time. In practice, due to different fitness landscapes between  
240 germline alleles, germline-encoded advantages might be preferentially overcome by lineages with  
241 specific alleles, allele combinations or heavy-light chain pairings.

242 Finally, when some germline alleles have a higher mutation rate than others, B cell lineages  
243 with high-mutation alleles are likely to dominate germinal centers in the long term due to their  
244 propensity to adapt (**Figure 2-Figure Supplement 5**), countering the tendency for allele frequencies  
245 to become less correlated over time and leading to a positive correlation in frequency deviations  
246 later in the response (**Figure 2**, right column; **Figure 2-Figure Supplement 4**).

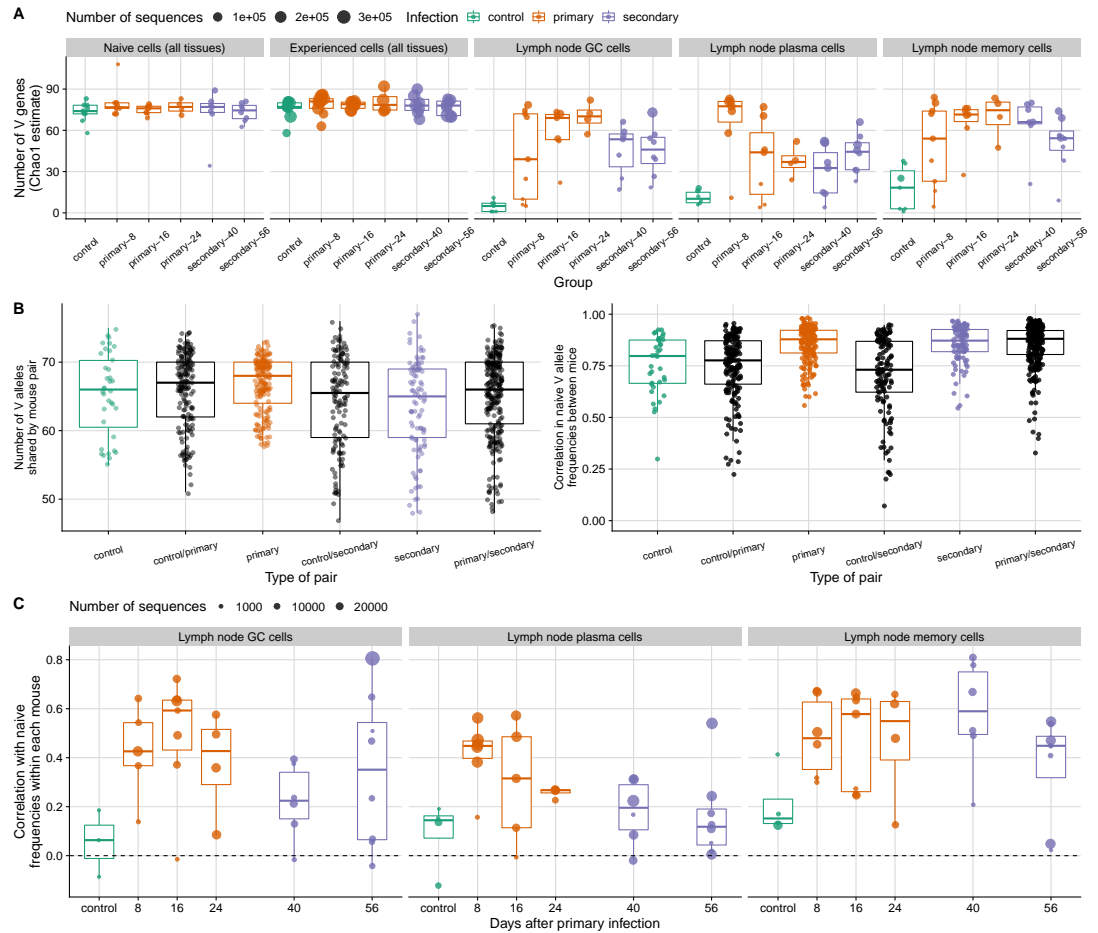

**Figure 3.** Immunoglobulin V gene usage in the mouse B cell response to influenza infection. **(A)** The number of germline immunoglobulin V alleles is shown for mice infected once or twice with a mouse-adapted H1N1 virus and sacrificed at different time points (8, 16, 24, 40 and 56 days after the primary infection, with the second infection at day 32). Uninfected control mice are shown in red. Each point represents a mouse. At the peak of the response, most alleles present in each mouse are represented in lymph-node germinal center (GC), plasma and memory cells, which were likely induced by the influenza infection. **(B)** Number of V alleles shared by pairs of mice in the naive repertoire (left) and the Pearson correlation in their frequencies for each pair (excluding mice with fewer than 100 reads in the naive repertoire; right). Each point represents a pair. **(C)** Pearson correlation within each mouse between V allele frequencies in influenza-induced populations and frequencies in the naive repertoire. Each point represents a mouse, and solid-line boxplots indicate the distribution in the observed data.

**Figure 3-Figure supplement 1.** Number of B cells sorted from mice.

**Figure 3-Figure supplement 2.** Evidence of B cell evolution and competition in infected mice.

**Figure 3-Figure supplement 3.** High-frequency amino acid mutations in different tissues.

**Figure 3-Figure supplement 4.** Probability that two B cell lineages sharing the same V allele have high-frequency mutations in common.

**Figure 3-Figure supplement 5.** Number of high frequency mutations as a function of lineage size in lymph nodes

**Figure 3-Figure supplement 6.** Similarity of CDR3 sequences sampled from different mice.

**Figure 3-Figure supplement 7.** Convergent CDR3 sequences from day 56 plasma cells.

**Figure 3-Figure supplement 8.** Fraction of B cell lineages mostly contained in a single tissue or cell type.



247 **Contingent allele frequencies in the mouse response to influenza infection despite**  
248 **evidence of germline-encoded advantages**

249 We compared these simulated dynamics with the B cell response of C57BL/6 mice infected with  
250 influenza virus once or twice and sacrificed at different times points (8, 16, 24, 40 and 56 days after  
251 the primary infection, with the secondary infection on day 32; Materials and Methods: “Experimen-  
252 tal infection of mice with an influenza A/H1N1 virus”). Because influenza viruses do not naturally  
253 infect mice, any germline-encoded specificities for influenza antigens are either evolutionary span-  
254 drels or the product of selection to recognize molecular patterns shared between influenza and  
255 pathogens that have historically infected mice. We used RNA sequencing to estimate the frequen-  
256 cies of germline alleles and the relative sizes of B cell lineages in each mouse. We focused on  
257 heavy-chain sequences sampled from the mediastinal lymph node because, consistent with pre-  
258 vious work (*Sealy et al., 2003*), cell sorting data indicated that lymph node B cells were induced  
259 by the influenza infection (control mice had very few germinal center, plasma or memory cells in  
260 the mediastinal lymph node; **Figure 3–Figure Supplement 1**). Early in the mouse response to in-  
261 fluenza, lymph node populations likely consist of extrafollicular plasma cells expanding outside of  
262 germinal centers, with germinal-center derived cells arriving later (*Sealy et al., 2003*) and persist-  
263 ing for as long as six months (*Yewdell et al., 2021*). Most germline V alleles observed in a mouse  
264 (across all tissues and cell types sampled) were represented in the influenza-induced lymph node  
265 populations, suggesting that most mouse V alleles can produce at least some receptors capable of  
266 binding influenza antigens (**Figure 3**). To compare the observed mouse responses with our simula-  
267 tions, we measured the correlation in germline V allele frequencies and in their deviations from the  
268 naive repertoire between pairs of infected mice (Materials and Methods: “Estimating correlations  
269 between mice”).

270 As expected, influenza infection led to competition and affinity maturation in mouse B cell line-  
271 ages (**Figure 3–Figure Supplement 2**). Serum antibody titers against the infecting virus measured  
272 by ELISA rose about 1,000 fold between days 8 and 24 and remained high. In parallel to this rise  
273 in antibody titers, germinal center and plasma cell populations became increasingly dominated by  
274 a few lineages, suggesting that lineages varied in fitness due initial differences in affinity, differ-  
275 ences acquired during the lineages’ subsequent evolution, or both. Lineages sampled at later time  
276 points had more high-frequency amino acid mutations within them (those present in 50% or more  
277 of the reads in a lineage). Those mutations include fixed mutations and those potentially rising to  
278 fixation via selection for affinity, and they are unlikely to have arisen from sequencing and ampli-  
279 fication errors (which we estimate at 1.8 per thousand nucleotide bases; Materials and Methods:  
280 “B cell receptor sequencing”). These trends were visible in the lymph nodes of infected mice but  
281 not apparent in other tissues or in control mice (**Figure 3–Figure Supplement 3**), suggesting they  
282 were driven by the influenza infection. (Influenza-specific lineages may have been present in other  
283 tissues, but our data do not allow us to distinguish them from lineages elicited by other antigens.)

284 Plasma cells and germinal center cells were ultimately dominated by lineages using different  
285 germline V alleles in different mice, consistent with the role of contingency observed in our simu-  
286 lations. Early in the response, germline allele frequencies in those cell types were correlated be-  
287 tween mice (**Figure 4A**, left panel). In both cell types, this initial similarity was likely partly due to the  
288 correlated germline frequencies in the naive repertoire (**Figure 3B**). In early plasma cells, it also re-  
289 flected the consistent overrepresentation of specific germline alleles, suggesting that those alleles  
290 contributed to higher affinity or adaptability than did others (**Figure 4A**, **Figure 4B**). For instance, in  
291 day-8 plasma cells, IGHV14-4\*01 increased in frequency relative to the naive repertoire in all 6 mice  
292 with enough data, becoming the most common V allele in 4 mice and the second most common  
293 in the other 2 (**Figure 4B**). In contrast, at later time points for plasma cells (**Figure 4–Figure Sup-  
294 plement 1**) and throughout the response for germinal center cells (**Figure 4–Figure Supplement 2**),  
295 the most common V allele was usually different in different mice, and most germline alleles were  
296 overrepresented relative to the naive repertoire in some mice but not in others. These results sug-

297 gest that while germline-encoded advantages may strongly shape the early B cell response, they  
298 do not predict B cell fitness in the long run.

299 To further test if the effect of germline-encoded advantages was strongest early in the response,  
300 we compared the observed patterns with a null model in which a lineage's fitness is independent  
301 of which germline V allele it uses, mimicking the equivalent-alleles scenario in our simulations.  
302 We did so by keeping the observed distribution of lineage sizes (a proxy for lineage fitness) while  
303 randomly assigning each lineage's germline V allele based on naive repertoire frequencies. Early in  
304 the plasma cell response, germline alleles were overrepresented much more consistently between  
305 mice than expected under this null model, suggesting that the early response was strongly shaped  
306 by the advantages associated with using those alleles (**Figure 4–Figure Supplement 3**). Later in the  
307 response, however, specific alleles were not overrepresented in different mice more often than  
308 expected if lineage fitness was independent of the germline V allele.

309 In contrast with germinal center and plasma cells, germline allele frequencies in memory cells  
310 remained similar between mice (**Figure 4A**) — and similar to naive allele frequencies within each  
311 mouse (**Figure 3C**) — throughout the response. Differences between memory cells and the other  
312 cell types could be expected if a higher fraction of memory cells is unrelated to the influenza infec-  
313 tion (uninfected controls had more memory B cells than plasma or germinal center cells in their  
314 lymph nodes, although they had fewer lymph node memory cells than did infected mice; **Figure 3–**  
315 **Figure Supplement 1**). In addition, these differences between cell types might reflect the relation-  
316 ship between affinity and B cell differentiation. Since activated B cells with low affinity are more  
317 likely than others to exit germinal centers and differentiate into memory cells (**Viant et al., 2020**),  
318 dominant lineages with high affinity for influenza antigens might contribute less to the memory  
319 cell population than they do to the germinal center and plasma cell populations. Consistent with  
320 that possibility, the increasing dominance by a few large and mutated lineages seen in germinal  
321 center and plasma cells of infected mice was not evident in their memory cells (**Figure 3–Figure**  
322 **Supplement 2**). Without dominance by a few lineages and whatever germline alleles they happen  
323 to use, germline allele frequencies in memory B cells might not stray as far from naive repertoire  
324 frequencies as do germline allele frequencies in the other cell types. Consistent deviations from  
325 the naive repertoire still occur (**Figure 4A, Figure 4–Figure Supplement 4**), as would be expected  
326 if using specific germline alleles makes B cell activation more likely. Of the activated B cells using  
327 those germline alleles, those cells with lower affinity than the rest might then differentiate into  
328 memory B cells soon after activation. For instance, IGHV14-4\*01, which was consistently overrep-  
329 resented relative to the naive repertoire in early plasma cells, was also overrepresented in the  
330 memory cells of 50% or more of the mice at every time point (**Figure 4–Figure Supplement 5**).

### 331 **Germline V alleles consistently overrepresented early in the response have low** 332 **predicted mutability in CDRs**

333 Our simulations suggest that the consistent overrepresentation of specific germline alleles early  
334 in the response is more likely to reflect germline-encoded affinity than germline-encoded adapt-  
335 ability (**Figure 2**). With sequence data alone, we cannot determine if consistently overrepresented  
336 germline V alleles do generate receptors with especially high affinity for influenza antigens. We can,  
337 however, estimate potential differences in adaptability between germline alleles based on their se-  
338 quences alone, using estimates of the propensity of different nucleotide motifs to undergo somatic  
339 hypermutation (although those estimates were derived from mouse light-chain rather than heavy-  
340 chain genes; **Cui et al. 2016**) (Methods: "Mutability analysis of germline alleles").

341 We found no clear evidence that germline alleles with higher predicted mutability in the CDRs  
342 (which might give those alleles a higher rate of affinity-changing mutations) tended to increase in  
343 frequency relative to the naive repertoire (**Figure 4–Figure Supplement 6**). Neither did germline al-  
344 leles with lower mutability in the structurally-important framework regions (FRs; where mutations  
345 are more likely to be deleterious than in CDRs) tend to increase in frequency. Instead, in day-8  
346 plasma cells we found the opposite relationship: germline alleles tended to increase in frequency

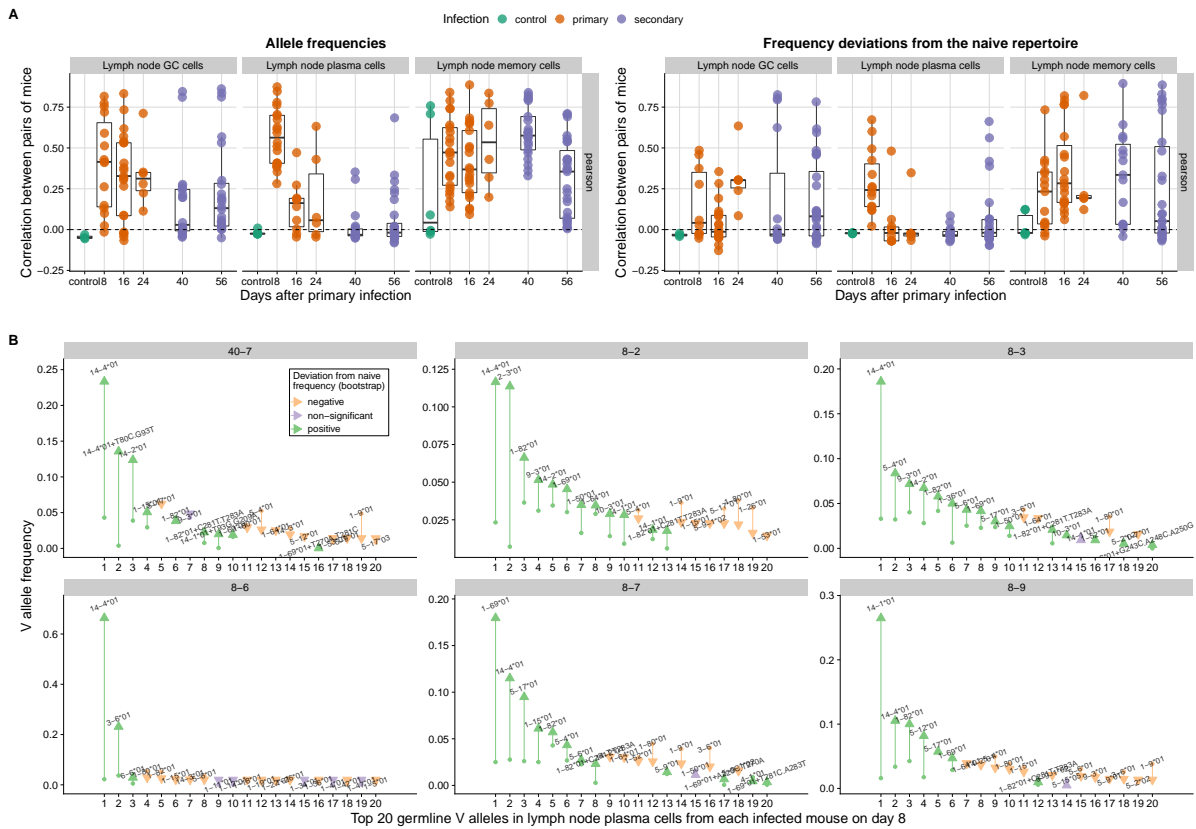

**Figure 4.** Correlation between mice in the V allele frequencies of influenza-induced populations and in the deviations of those frequencies from the naive repertoire. **(A)** Distribution of pairwise correlations at each time point. Each point represents a pair of mice with at least 100 reads each in the respective B cell population. We computed correlations using Pearson's coefficient and measured frequency deviations as the ratio between a V allele's frequency in an influenza-induced population and its frequency in the naive repertoire. **(B)** Frequency of the 20 most common V alleles in the lymph node plasma cells of each mouse 8 days after primary infection. Each panel represents an individual mouse. The arrows go from each allele's frequency in the naive repertoire to its frequency in lymph node plasma cells. Each allele was labelled as significantly over- or underrepresented in each mouse if the ratio of its experienced and naive frequencies was outside a 95% confidence interval obtained by bootstrap sampling ( $n = 500$ ) of experienced frequencies from the naive repertoire (preserving the observed total number of sequences in each mouse). Mouse 40-7, which was sacrificed 8 days after the secondary infection and had ELISA titers similar to those of day-8 infected mice, was considered a day-8 primary-infection mouse because it showed no signs of infection after the first inoculation and had ELISA titers similar to those of day-8 infected mice.

- Figure 4-Figure supplement 1.** Top germline V alleles in lymph node plasma cells across time points.
- Figure 4-Figure supplement 2.** Top germline V alleles in lymph node GC cells across time points.
- Figure 4-Figure supplement 3.** Between-mouse correlations compared with a null model representing the effects of contingency.
- Figure 4-Figure supplement 4.** Top germline V alleles in lymph node memory cells across time points.
- Figure 4-Figure supplement 5.** Alleles consistently overrepresented in early plasma cells shown for other cell types and time points.
- Figure 4-Figure supplement 6.** Correlation between predicted germline allele mutability and frequency deviations from the naive repertoire
- Figure 4-Figure supplement 7.** Sensitivity analysis for collapsing identical reads from the same mouse, tissue, cell type and isotype.
- Figure 4-Figure supplement 8.** Sensitivity analysis using an independent dataset to estimate naive V allele frequencies.

347 relative to the naive repertoire if they had high mutability in FRs and low mutability in CDRs. The  
 348 consistently overrepresented and dominant allele IGHV14-4\*01, for instance, is predicted to be  
 349 one of the least mutable in CDRs 1 and 2, (**Figure 4-Figure Supplement 6**). Two other germline  
 350 alleles consistently overrepresented in day-8 plasma cells, IGHV1-82\*01 and IGHV1-69\*01 (5 of 6

351 mice with enough data), have similarly low predicted mutability in CDR1, though not in CDR2. If  
352 those alleles do have a high propensity to bind influenza antigens, low mutability in CDRs 1 and  
353 2 might reduce the chance that mutations disrupt this initial binding, potentially reinforcing the  
354 fitness advantage of B cells using those alleles.

### 355 **B cell lineages sharing the same germline V allele rarely had mutations in common**

356 While germinal center cells and plasma cells were increasingly dominated by large lineages with  
357 somatic mutations, the sheer number of mutations acquired by a B cell lineage did not predict its  
358 success. The biggest lineages in the influenza-induced B cell populations did not generally more  
359 mutations than smaller lineages (**Figure 3–Figure Supplement 5**). This observation is consistent  
360 with previous work showing that the number of mutations in the B cell receptor does not predict  
361 affinity or neutralization strength (*Viant et al., 2020; Sakharkar et al., 2021; Neumeier et al., 2021*).  
362 Thus, successful lineages might be those that acquire one or a few substitutions with large effects  
363 on affinity, instead of many substitutions with smaller effects.

364 We found no tendency for these mutations to be the same in B cell lineages using the same  
365 germline V allele. Most pairs of lineages with the same V allele had no high-frequency mutations  
366 in common (**Figure 3–Figure Supplement 4**). For specific cell types and specific V alleles, we found  
367 some instances of high-frequency mutations shared by multiple lineages. However, they were  
368 constrained to one or two mice, suggesting they might be an artifact of the incorrect partitioning of  
369 a single large lineage into several small ones. Overall, these results suggest that influenza infection  
370 does not strongly select the same mutations in B cell lineages with the same germline V alleles.  
371 Multiple ways to improve affinity might be possible for the same germline V allele, especially if  
372 epistatic interactions between the V segment and the other segments cause the same mutation to  
373 have different effects in different lineages.

### 374 **Limited evidence of selection for specific CDR3 sequences**

375 While binding can occur via the two CDRs solely encoded by the V segment, it often occurs via  
376 CDR3, which spans the junction between the segments. Thus, while selection for receptors with  
377 specific germline V alleles seems to have a limited effect, influenza antigens might also select for re-  
378 ceptors with specific CDR3 sequences. To investigate this possibility, we computed the amino acid  
379 sequence and biochemical similarity of CDR3 sequences sampled from different mice and matched  
380 for the same length (Methods: “Measuring CDR3 sequence similarity”). On average, length-matched  
381 CDR3 sequences from the influenza-induced populations of different mice were no more similar  
382 than sequences sampled from their naive repertoires (**Figure 3–Figure Supplement 6**). This result  
383 suggests that influenza infection in mice does not strongly select for B cell receptors with particular  
384 CDR3 sequences. While individuals exposed to the same pathogen are more likely to share specific  
385 CDR3 sequences compared with healthy individuals (*Ortega et al., 2021*), our results suggest those  
386 convergent CDR3s do not make up a large fraction of the response.

387 Finally, influenza antigens might select for combinations of specific germline alleles and CDR3  
388 sequences (*Jackson et al., 2014; Harshbarger et al., 2021*). To investigate this possibility, we com-  
389 puted the similarity of CDR3 sequences from different mice matched both for the same length  
390 and the same germline heavy-chain V allele. Length- and allele-matched CDR3 sequences from  
391 the lymph node populations of different mice were not, overall, more similar than length- and  
392 allele-matched sequences from the naive repertoire (**Figure 3–Figure Supplement 6**). This result  
393 suggests that, overall, binding influenza antigens with a specific germline V allele does not require  
394 specific CDR3 sequences, even if specific combinations of germline alleles and CDR3 sequences  
395 can be found in the response of different individuals (*Jackson et al., 2014*). In day-56 plasma cells,  
396 we found higher similarity between length- and allele-matched CDR3 sequences than in the naive  
397 repertoire, driven by two clusters of sequences with different lengths (each using a small set of V  
398 alleles; **Figure 3–Figure Supplement 6, Figure 3–Figure Supplement 7**). Collectively, these CDR3 se-  
399 quences occurred at a very low frequency throughout the response but made up a significant pro-

400 portion of plasma cell sequences on day 56. Why these combinations of specific CDR3 sequences  
401 and specific alleles might have been selected only late into the secondary response is unclear.

## 402 Discussion

403 How much effective B cell responses depend on particular germline immunoglobulin genes ver-  
404 sus their subsequent evolution by affinity maturation has important consequences for adaptive  
405 immune evolution and vaccination strategies but remains understudied. In simulations, we find  
406 that initial germline-encoded advantages are mostly overcome by B cell lineages using different  
407 germline alleles in different individuals. These contingent outcomes arise because the growth of B  
408 cell lineages also depends on factors that are largely unpredictable, including the timing, order and  
409 effect of mutations in different lineages, genetic drift, demographic stochasticity and stochasticity  
410 in VDJ recombination. Our simulations and experiments suggest that the effects of contingency  
411 increase over time: The longer B cell lineages evolve, the more opportunity there is for differences  
412 to accumulate as those processes play out. Like evolution in general (**Gould, 1989; Blount et al.,**  
413 **2018; Xie et al., 2021; Park et al., 2022**), the evolution of B cell repertoires in different individuals ex-  
414 perience identical primary infections might become decreasingly predictable at the genetic level  
415 over time. Yet, as is often the case in other systems (**Lässig et al., 2017**), the resulting phenotype  
416 is remarkably predictable: potent antibodies reliably emerge in most individuals, suggesting there  
417 are many different ways to achieve high affinity against the same pathogen.

418 A testable prediction suggested by those results is that germline allele usage might diverge be-  
419 tween people following repeated exposures (such as sequential influenza infections or vaccines) or  
420 over time during chronic infections (such as HIV). This prediction depends on the extent to which re-  
421 sponses to repeated or prolonged infections rely on the reactivation of preexisting memory cells  
422 and their reentry into germinal centers (**Li et al., 2012; Andrews et al., 2015; Mesin et al., 2020;**  
423 **Turner et al., 2020; Hoehn et al., 2021**). Divergence in germline allele frequencies might be small if  
424 the response to each exposure is dominated by lineages newly recruited from the naive repertoire.  
425 In contrast, successive bouts of evolution by recalled B cell lineages might increase the chance that  
426 they overcome germline-encoded advantages. Vaccine strategies focused on the recruitment of  
427 specific alleles (**McGuire et al., 2014; Jardine et al., 2016; Bonsignori et al., 2017; Lin et al., 2020**)  
428 might be hindered in their immediate goal by contingent patterns of allele usage in different peo-  
429 ple, especially if the strategy involves multiple immunizations or immunizations in people with  
430 extensive immune memory.

431 In addition to varying over time, the similarity of the induced B cell repertoire might also vary  
432 with the complexity of the antigen, since antigens encoding multiple epitopes present more po-  
433 tential specificities. Although certain amino acid motifs can make some germline alleles highly  
434 polyreactive (**Hwang et al., 2014; Shiroishi et al., 2018**), individual alleles might be unlikely to have  
435 a consistent advantage over others across all epitopes in an antigen or all antigens in a pathogen.  
436 Thus, germline-encoded specificities might be more apparent in B cells specific for a single epitope  
437 than in the set of all B cells binding the antigen or pathogen. Some previous observations are  
438 consistent with this hypothesis. For instance, the response to haptens (simple antigens with few  
439 potential epitopes) tends to be dominated by one or a few alleles (**Cumano and Rajewsky, 1985,**  
440 **1986**), while the response to complex antigens can use many (**Kuraoka et al., 2016**). Only a handful  
441 of germline alleles are represented in monoclonal antibodies specific for narrowly defined sites on  
442 influenza hemagglutinin (**Guthmiller et al., 2021, 2022**), while tens of alleles are present in mono-  
443 clonal antibodies that bind different sites on the major domains of the SARS-CoV-2 spike protein  
444 (**Robbiani et al., 2020; Sakharkar et al., 2021**). Many germline V alleles are found in monoclonal an-  
445 tibodies against the IsdB protein of *Staphylococcus aureus*, but antibodies targeting each particular  
446 epitope tend to use only one or two of them (**Yeung et al., 2016**).

447 Understanding this variation further requires overcoming limitations of our analyses. Similarity  
448 between individuals might decay even faster in genetically diverse outbred populations than in the  
449 inbred mice we used in the experiments. In simulations, we varied the strength of contingency by

450 varying the frequency and the effect size of somatic mutations relative to the variation in affinity  
451 from VDJ recombination alone. Although genetic drift, demographic stochasticity and priority ef-  
452 fects in the colonization of germinal centers were present in our model, we did not systematically  
453 explore their impacts. Understanding the importance of those processes might require longitu-  
454 dinal data to resolve the timing of cell arrivals in germinal centers and the lineages' population  
455 dynamics early in the response. Complementing our sequence analysis, affinity measurements  
456 could be used to estimate the affinity distributions of naive B cells using different germline alleles,  
457 compare variation within and between those distributions, and directly test if alleles with higher-  
458 affinity distributions tend to be used by B cell lineages with high growth rates. Affinity measure-  
459 ments could also be used to study germline allele usage in pathogen-specific B cell lineages outside  
460 of lymph nodes, which we could not identify with sequence data alone.

461 Finally, if germline-encoded specificities are most consequential early in the response, long-  
462 term selection to “pre-adapt” germline genes might be linked to the benefits of responding rapidly  
463 to commonly encountered pathogens. Mathematical models suggest that maintaining innate de-  
464 fenses against a particular pathogen becomes more advantageous the more frequently the pathogen  
465 is encountered (*Mayer et al., 2016*). Germline alleles specific to common pathogens or pathogenic  
466 motifs might be selected, effectively hardcoding innate defenses into the adaptive immune sys-  
467 tem (*Collins and Jackson, 2018*). A reliable supply of receptors against common enemies might be  
468 especially important in small and short-lived organisms, which can more quickly die of infection  
469 and have fewer naive B cells with which to cover the vast space of possible pathogens (*Collins and*  
470 *Jackson, 2018*). Reinforcing germline-encoded specificities might also be especially useful when the  
471 opportunity for adaptation is limited, as might be the case for pathogens that induce extrafollicu-  
472 lar responses without extensive B cell evolution (although affinity maturation can occur outside of  
473 germinal centers; *Di Niro et al. 2015; Elsner and Shlomchik 2020*). Understanding what conditions  
474 favor similar versus contingent allele usage in the antibody repertoire may thus shed light on the  
475 long-term evolution of immunoglobulin genes.

## 476 **Materials and Methods**

### 477 **Model of B cell dynamics**

478 We modeled B cell evolution and competition in germinal centers using stochastic simulations  
479 based on a Gillespie algorithm. There are three types of independent events in the model: immi-  
480 gration of individual B cells into germinal centers, cell division and death. The total rate of events  
481  $\lambda$  is given by

$$\lambda = \lambda_{\text{immigration}} + \lambda_{\text{division}} + \lambda_{\text{death}} \quad (1)$$

482 where the terms on the right-hand side correspond to the rate of each kind of event (mutation is  
483 associated with cell division and is therefore not an independent event). The algorithm consists of  
484 drawing the time to the next event by sampling from an exponential distribution with rate  $\lambda$ . Once  
485 an event has occurred, we make a second draw to determine its type. The probability for each  
486 type of event in this second draw is proportional to the corresponding event-specific rate (e.g., the  
487 probability that the next event is a cell division is  $\lambda_{\text{division}}/\lambda$ ). After determining the event type, we  
488 update event rates and draw the time to the next event, and so on until a maximum time  $t_{\text{max}}$  is  
489 reached. For each germinal center, we record the number of cells in each B cell lineage (and the V  
490 alleles used by the lineages) at the end of day 1 and then every 5 days starting on day 5.

491 Immigration of B cells into germinal centers is restricted to an initial period with duration  $t_{\text{imm}}$ .  
492 Parameter  $I_{\text{total}}$  controls the expected number of lineages that enter each germinal center during  
493 that time (each recruited B cell is the founder of an individual lineage). Given those parameters,  
494 we let  $\lambda_{\text{immigration}}$  be a linearly decreasing function over time reaching 0 at  $t_{\text{imm}}$ , with intercept and  
495 slope chosen such that  $I_{\text{total}}$  lineages are expected to enter each GC by that point ( $\lambda_{\text{immigration}}$  then  
496 remains at 0 until the end of the simulation).

497 Once an immigration occurs, we randomly sample a single immigrant from a newly generated  
498 recruitment pool of 1,000 naive cells whose V alleles are drawn with replacement from the naive  
499 repertoire. For each member of the recruitment pool, we sample an affinity value based on the  
500 naive affinity distribution associated with its V allele. By default, all alleles have the same normal  
501 affinity distribution with mean and standard deviation equal to 1 (we sample from the associated  
502 truncated distribution to avoid negative values). Depending on the scenario, naive B cells using  
503 specific V alleles may have a different distribution with mean  $1 + s$  and the same standard deviation.  
504 The probability that each cell in the recruitment pool is chosen as the new immigrant is then  
505 proportional to its affinity.

506 The rate of cell divisions depends on the total number of cells inside the germinal center,  $N$ ,  
507 and on the rate of cell division for each individual cell,  $\mu(N)$ :

$$\lambda_{\text{division}}(N) = N \times \mu(N) \quad (2)$$

508 To represent competition for antigen,  $\mu(N)$  decreases with  $N$  so that it equals a fixed per-cell death  
509 rate  $\delta$  when the population is at carrying capacity ( $N = K$ ):

$$\mu(N) = \mu_{\text{max}} \times \exp\left[\frac{N}{K}(\ln \delta - \ln \mu_{\text{max}})\right] \quad (3)$$

510 Once a division event occurs, we randomly sample a B cell to divide. The probability that each is B  
511 cell is chosen is proportional to its affinity. Each dividing B cell has some probability of having a mu-  
512 tation that changes affinity by a normally distributed amount with mean 0 and standard deviation  
513  $\beta$  (affinity is set to 0 if the mutation produces a negative value).

514 Finally, with a fixed per-cell death rate, the population-level death rate is given simply by

$$\lambda_{\text{death}}(N) = N\delta \quad (4)$$

515 When simulating alleles with higher naive affinity or higher mutation rates than others, we  
516 chose the set of 5 alleles present in all mice with average naive frequency of 2-3% (the typical  
517 median frequency in the naive repertoire).

### 518 **Experimental infection of mice with an influenza A/H1N1 virus**

519 We infected 40 8-week-old female C57BL/6 mice weighing 20-22g (8 for each time point) intranasally  
520 with 0.5 LD<sub>50</sub> of a mouse-adapted pandemic H1N1 strain (A/Netherlands/602/2009) in a total of 30  
521  $\mu\text{L}$  of PBS under full anesthesia. In addition, two controls for each time point were given PBS only.  
522 All mouse experiments were approved by The University of Chicago Institutional Animal Care and  
523 Use Committee (IACUC protocol 71981).

### 524 **Tissue processing, cell sorting and nucleic acid extraction**

525 We prepared single cell suspensions from the mediastinal lymph node, spleen and both femurs  
526 harvested at the indicated time points. B cells were first enriched from the splenocyte suspen-  
527 sion by MACS (magnetic activated cell sorting) using the Pan B cell Isolation Kit (Miltenyi Biotec),  
528 followed by staining for FACS (fluorescence activated cell sorting). The lymph node and bone mar-  
529 row cells were directly stained for FACS. Antibodies used for sorting were anti-B220 (clone RA3-6B2,  
530 Biolegend), IgD (clone 11-26c.2a, Biolegend), anti-CD4 (clone RM4-5, Biolegend), anti-CD8 (clone 53-  
531 6.7, Biolegend), anti-CD38 (clone 90, Biolegend), anti-CD95 (clone Jo-2; BD Biosciences), anti-CD138  
532 (clone 281-2, Biolegend), anti-F4/80 (clone BM8, Biolegend), anti-GL7 (clone GL7, BD Biosciences),  
533 anti-Sca-1 (clone D7, Biolegend), and anti-TER-119 (clone TER-119, Biolegend). Antibody stainings  
534 were preceded by adding Fc block (anti-CD16/CD32; clone 2.4G2, BD Biosciences). For sorting, the  
535 cells were first gated on size and granularity (forward and side scatter, respectively) to exclude de-  
536 bris, followed by doublet exclusion. We sorted naive (IgD+B220+), plasma (IgD-Sca-1hiCD138hi),  
537 memory (IgD-B220+CD95-CD38hi) and germinal center (IgD-B220+CD95+ CD38loGL-7+) cells af-  
538 ter excluding cells expressing CD4, CD8, TER-199 or F4/80 (to exclude T cells, erythroid cells and

539 macrophages). After spinning down cells and removing the PBS supernatant, we extracted DNA  
540 and RNA from the cell pellets using the AllPrep DNA/RNA Mini Kit (Qiagen), according to the man-  
541 ufacturer's protocol. All samples were kept frozen until sequenced.

## 542 **B cell receptor sequencing**

543 We generated immunoglobulin heavy chain (IGH) DNA libraries from complementary DNA gener-  
544 ated from 10-500 ng of total RNA using Superscript III (Invitrogen) reverse transcriptase and ran-  
545 dom hexamer primers. For PCR amplifications, we used multiplexed primers targeting the mouse  
546 framework region 1 (FR1) of IGHV in combination with isotype-specific primers targeting constant  
547 region exon 1 of IgA, IgD, IgE, IgG, or IgM (Table 2). We performed separate PCR reactions for each  
548 isotype to avoid formation of inter-isotype chimeric products. We barcoded each sample with  
549 8-mer primer-encoded sequences on both ends of the amplicons and performed PCR amplifica-  
550 tion in two steps. First, we generated amplicons using primers with the partial Illumina adapter,  
551 the sample-specific barcode and the locus-specific sequence. In the second step, we performed  
552 another PCR to complete the Illumina adapter sequence and to ensure final products were not am-  
553 plified to saturation. We purified pooled products by agarose gel electrophoresis and extraction.  
554 We used a 600 cycle v3 kit to sequence products using an Illumina MiSeq instrument.

555 We estimated the rate at which errors were introduced during amplification and sequencing by  
556 comparing the sequenced reads with the reference sequence for the corresponding isotype. Be-  
557 cause the constant region does not undergo somatic hypermutation, we counted each mismatch  
558 between the end of the J gene and the beginning of the conserved region primer as an error intro-  
559 duced by sequencing and amplification. Based on 187,500 errors found out of 104,092,368 bases  
560 analyzed, we estimated the error rate to be 1.80 mutations per thousand bases (95% binomial CI  
561 1.79-1.81).

## 562 **ELISA**

563 We coated 96-well ELISA plates (Thermo Fisher Scientific) overnight at 4°C with eight hemagglutina-  
564 tion units (HAU) of virus in carbonate buffer. We used horseradish peroxidase (HRP)-conjugated  
565 goat anti-mouse IgG antibody (Southern Biotech) to detect binding of serum antibodies, followed  
566 by development with Super Aquablue ELISA substrate (eBiosciences). We measured absorbance  
567 at 405 nm on a microplate spectrophotometer (Bio-Rad). We analyzed serum samples starting at  
568 a top dilution of 1:20 (PBS controls and day 8 animals) or 1:1000 (all other samples), followed by  
569 2-fold dilutions in 8 (PBS controls and day 8 animals) or 16 steps. We determined the end titer as  
570 the last dilution point with an OD value of > 2x the blank average OD value for each respective  
571 plate.

## 572 **Estimating the frequencies of V alleles and B cell lineages**

573 We used *partis* v0.15.0 to partition sequences into lineages and identify the germline alleles used  
574 by each lineage's naive ancestor (accounting for variation in the set of germline alleles present in  
575 each mouse; **Ralph and Matsen 2016a,b**, 2019). We used the fraction of reads corresponding to  
576 each allele as a proxy for the frequency of that allele in each B cell population. To reduce the error  
577 in frequency estimates, we excluded B cell populations with fewer than 100 reads in a mouse. Since  
578 we did not barcode individual cells or RNA molecules during sequencing, the number of reads with  
579 a particular sequence reflects not only the number of B cells with that sequence but also their  
580 transcription levels. However, we found similar results using the number of unique sequences to  
581 estimate the abundance of each lineage or allele (i.e., counting multiple identical reads from the  
582 same mouse, tissue, cell type and isotype only once; **Figure 4-Figure Supplement 7**).

583 We measured the size of each lineage in each lymph-node B cell population as the number of  
584 reads from that lineage in that population (as opposed to the number of reads in the lineage across  
585 all cell types and tissues). B cell lineages were mostly confined to a single tissue and usually domi-  
586 nated by a single cell type (**Figure 3-Figure Supplement 8**; note that the partitioning of sequences



587 into lineages was agnostic to cell type and tissue).

588 While we initially considered Dump-IgD+B220+ cells as naive cells, we noticed that many se-  
589 quences obtained from them were extensively mutated relative to their inferred germline genes  
590 and were also inferred to be part of large clonal expansions. To exclude reads originating from  
591 non-naive B cells sorted as IgD+B220+, we considered a read as likely coming from a naive cell if it  
592 met all of the following criteria: 1) it came from IgD+B220+ samples; 2) its isotype was IgM or IgD;  
593 3) it belonged to a clone that had a single unique sequence across its reads (and the reads all came  
594 from IgD+B220+ samples), and 4) that sequence had at most two nucleotide mutations in the V  
595 gene region. To compute naive frequencies, we pooled sequences meeting those criteria across  
596 all tissues. When computing experienced-to-naive frequency ratios, we adjusted the frequencies  
597 of germline alleles that were sampled in an experienced B cell population but not in naive B cells,  
598 since those alleles must have been present in naive B cells even though they were not sampled. In  
599 those cases, we imputed a single sequence to the allele in the naive repertoire then recalculated  
600 naive allele frequencies accordingly. When computing frequency deviations from the naive reper-  
601 toire, we excluded mice with fewer than 100 naive reads even if the corresponding experienced  
602 population had more than 100 reads.

603 To test if our results were robust to uncertainty in the identification of naive B cells in our data,  
604 we alternatively estimated V allele frequencies from naive B cells (CD138-CD19+IgD++IgM+CD23++  
605 CD21+PI-) sampled by **Greiff et al. (2017)** from the spleen of healthy C57BL/6 mice. For these data,  
606 we processed raw paired-end reads using *presto* v.0.6.2. (**Vander Heiden et al., 2014**), then used  
607 *partis* v0.15.0 to identify germline V alleles for a random sample of 20,000 sequences per mouse.  
608 V allele frequencies (measured by the fraction of total reads assigned to each gene in each mouse)  
609 were positively correlated between this independent dataset and the designated naive populations  
610 from our data (mean Spearman correlation coefficient between pairs of mice from each dataset  
611 = 0.68, interquartile range 0.60 – 0.77). We repeated the analysis of pairwise frequency-deviation  
612 correlations over time after replacing naive frequencies in our mice with the average frequency of  
613 each gene in the **Greiff et al. (2017)** dataset, preserving the number of reads in each mouse. When  
614 calculating the average allele frequencies in the alternative data set, we artificially assigned a single  
615 read to alleles present in our mice but absent from the alternative data set (since genes present  
616 in the experienced cells cannot be entirely missing from the naive repertoire) and re-normalized  
617 frequencies so they would sum to 1. Frequency deviations calculated based on this alternative  
618 data set were similar to those estimated using our own data (**Figure 4–Figure Supplement 8**).

### 619 **Estimating correlations between mice**

620 We used Pearson's correlation coefficient to measure the correlation between mice in germline  
621 allele frequencies and their deviations from the naive repertoire. Pearson's coefficient was better  
622 able to discriminate between different scenarios than Spearman's coefficient, which measures the  
623 correlation in frequency deviation ranks instead of using the actual values. In simulations, using  
624 Spearman's coefficient leads to a positive correlation in frequency deviations between individuals  
625 even in the scenario where all alleles are functionally equivalent (**Figure 2–Figure Supplement 6**).  
626 This pattern is driven by the exclusion from the response of alleles with very low naive frequen-  
627 cies (which tend to be the same alleles in different individuals), as those alleles are unlikely to be  
628 represented in lineages that successfully establish in germinal centers (repeating the simulations  
629 assuming all alleles have identical frequencies in the naive repertoire eliminates this pattern; **Fig-  
630 ure 2–Figure Supplement 6**).

### 631 **Identifying overrepresented germline alleles**

632 To determine which germline alleles were consistently overrepresented in experienced B cell pop-  
633 ulations relative to the naive repertoire, we compared the frequency deviations for each germline  
634 allele (separately for each type of B cell) with the distribution expected if alleles were sampled  
635 based on naive frequencies alone (maintaining the observed the number of sequences in each

636 mouse). For each germline allele, we then counted the number of mice with stronger deviations  
637 from the naive repertoire than expected under this null distribution (using a 95% bootstrap confi-  
638 dence interval).

### 639 **Mutability analysis of germline alleles**

640 To estimate the mutability of mouse germline V alleles, we used the RS5NF mutability scores  
641 estimated by **Cui et al. 2016** using non-functional mouse kappa light-chain sequences and im-  
642 plemented in R package *shazam*. These scores describe the relative mutability of all possible 5-  
643 nucleotide motifs. We estimated the mutability of each framework region (FR) and complementarity-  
644 determining region (CDR) as the average score across motifs in the region. We then calculated an  
645 average for all FRs weighted by the length of each FR, and similarly for CDRs. We used *igblast*  
646 v1.14.0 to identify the FRs and CDRs of each germline V allele sequence identified by *partis*.

### 647 **Measuring CDR3 sequence similarity**

648 We compared the amino acid sequence similarity and biochemical similarity of pairs of CDR3 se-  
649 quences sampled from different mice and matched either for length alone or both for length and  
650 V allele. To limit the number of comparisons, we proceeded as follows. For each pair of mice, we  
651 chose one mouse and sampled 500 sequences of the same cell type. For each sequence length  
652 represented in this sample, we paired sequences from the first sample with randomly chosen se-  
653 quences of the same length from the second mouse. If matching sequences both for length and  
654 V allele, we did this second sampling separately for each combination of V allele and sequence  
655 length present in the first sample. This procedure matches sequences while preserving the length  
656 distribution (or the joint distribution of length and V alleles) in the first sample.

657 We measured amino acid sequence similarity as the proportion of sites with the same amino  
658 acid in both sequences. Following previous work (**Hershberg and Shlomchik, 2006; Saini and Her-  
659 shberg, 2015**), we measured biochemical similarity as the proportion of sites in which the amino  
660 acids of both sequences belonged to the same category in the classification by (**Chothia et al.,  
661 1998**): hydrophobic (F, L, I, M, V, C, W), hydrophilic (Q, R, N, K, D, E) or neutral (S, P, T, A, Y, H, G).

**Table 2.** Primers for mouse heavy chain B cell receptors.

| Primer name    | Sequence                |
|----------------|-------------------------|
| P7-VH1-MsFR1-A | CCTGGGGCTTCAGTGA        |
| P7-VH1-MsFR1-B | GCCTGGGACTTCAGTGA       |
| P7-VH1-MsFR1-C | CCTGGGGCCTCAGTGA        |
| P7-VH1-MsFR1-D | GCCTGGGGCTTCAGTAA       |
| P7-VH2-MsFR1   | CCCTCACAGAGCCTGT        |
| P7-VH3-MsFR1   | CTTCAGGAGTCAGGACCT      |
| P7-VH5-MsFR1-A | GTCCCTGAAACTCTCCTGTG    |
| P7-VH5-MsFR1-B | GCCTGGAAGGTCCGT         |
| P7-VH5-MsFR1-C | GTCCCTGAAACTCTCCTG      |
| P7-VH7-MsFR1   | TTCTCTGAGACTCTCCTGTG    |
| P7-VH9-MsFR1   | TGGAGAGACAGTCAAGATCTCC  |
| P7-VH10-MsFR1  | GATTGGTGCAGCCTAAAGG     |
| P7-VH11-MsFR1  | GCTTGGTGCAACCTGG        |
| P7-VH12-MsFR1  | TGCTGTCATCAAGCCATCA     |
| P7-VH14-MsFR1  | AGTCAAGTTGTCCTGCA       |
| Ms-Tim-IgM     | GGGAAGACATTTGGGAAGGAC   |
| Ms-Tim-IgD     | TGAGAGGAGGAACATGTCAG    |
| Ms-Inner-IgG1  | GCTCAGGGAAATAGCCCTTGAC  |
| Ms-Inner-IgG2  | GCTCAGGGAAATAACCCTTGAC  |
| Ms-Inner-IgG2b | ACTCAGGGAAAGTAGCCCTTGAC |
| Ms-Inner-IgG3  | GCTCAGGGAAAGTAGCCTTTGAC |
| Ms-Tim-IgA     | GTCAGTGGGTAGATGGTGG     |
| Ms-Tim-IgEc    | CCAGGCAGCCCAGGGTTCATGG  |

**Table 3.** PCR conditions.

| 1st PCR              |                         | 2nd PCR                |                   |
|----------------------|-------------------------|------------------------|-------------------|
| usual initial mix    |                         |                        |                   |
|                      | per rxn                 | MM                     | 10                |
| 10x buffer           | 3 $\mu$ L               | Q mix                  | 4                 |
| MgCl <sub>2</sub>    | 1.8                     | f primer               | 0.4               |
| 2mM dNTP             | 3                       | r primer               | 0.4               |
| v primer             | 3                       | template               | 0.5               |
| c primer             | 3                       | H <sub>2</sub> O       | 4.7               |
| template             | 4 $\mu$ L (200ng total) |                        |                   |
| Taq                  | 0.3                     | <b>2nd PCR cycle</b>   |                   |
| H <sub>2</sub> O     | 11.9                    | usual illumina cycling |                   |
| total                | 30                      |                        |                   |
| <b>1st PCR cycle</b> |                         | 95°C                   | 15 min            |
|                      |                         | 95°C                   | 30s (× 12 cycles) |
|                      |                         | 60°C                   | 45s               |
| 94°C                 | 7 min                   | 72°C                   | 1.5 min           |
| 94°C                 | 30s (× 35 cycles)       | 72°C                   | 10 min            |
| 56°C                 | 45s                     |                        |                   |
| 72°C                 | 1.5 min                 |                        |                   |
| 72°C                 | 10 min                  |                        |                   |

## 662 **Data and code availability**

663 Code for the analyses is available at [http://github.com/cobeylab/v\\_gene\\_selection](http://github.com/cobeylab/v_gene_selection). Data, interme-  
664 diate files and results are available on Zenodo (<https://doi.org/10.5281/zenodo.7080191>). Raw fastq  
665 files are available on SRA [Accession number pending].

## 666 **Competing interests**

667 C.T.S. has consulted for Alvea / Telis Bioscience Inc. on the design of universal influenza vaccines.  
668 The other authors report no competing interests.

## 669 **Acknowledgments**

670 Lauren McGough and Christopher Russo made helpful comments and suggestions to a draft of the  
671 manuscript. This project has been funded in part with Federal funds from the National Institute of  
672 Allergy and Infectious Diseases, National Institutes of Health, Department of Health and Human  
673 Services under grant DP2 AI117921, CEIRS Contract No. HHSN272201400005C and CEIRR contract  
674 75N93021C00015 to S.C., grants R01AI127877, R01AI130398, U19AI057229 to S.D.B and grants  
675 U19AI082724, U19AI109946, U19AI057266, CEIRS contract HHSN272201400005C, CEIRR contract  
676 75N93019R00028 and CIVIC contract 75N93019C00051 to P.C.W. The content is solely the respon-  
677 sibility of the authors and does not necessarily represent the official views of the NIAID or the  
678 National Institutes of Health. The project was also partly supported by a Complex Systems Scholar  
679 Award from the James S. McDonnell Foundation awarded to S.C. M.C.V. was partly supported by  
680 a William Rainey Harper Dissertation Fellowship awarded by the University of Chicago. This work  
681 was completed in part with resources provided by the University of Chicago Research Computing  
682 Center.

## 683 **References**

- 684 **Andrews SF**, Huang Y, Kaur K, Popova LI, Ho IY, Pauli NT, Henry Dunand CJ, Taylor WM, Lim S, Huang M, Qu  
685 X, Lee JH, Salgado-Ferrer M, Krammer F, Palese P, Wrarmert J, Ahmed R, Wilson PC. Immune history pro-  
686 foundly affects broadly protective B cell responses to influenza. *Science translational medicine*. 2015 Dec;  
687 7(316):316ra192. <http://stm.sciencemag.org/content/7/316/316ra192>, doi: 10.1126/scitranslmed.aad0522.
- 688 **Beatty J**, Carrera I. When What Had to Happen Was Not Bound to Happen: History, Chance, Narrative, Evolu-  
689 tion. *Journal of the Philosophy of History*. 2011 Jan; 5(3):471–495. [https://brill.com/view/journals/jph/5/3/](https://brill.com/view/journals/jph/5/3/article-p471_10.xml)  
690 [article-p471\\_10.xml](https://brill.com/view/journals/jph/5/3/article-p471_10.xml), doi: 10.1163/187226311X599916, publisher: Brill.
- 691 **Blount ZD**, Lenski RE, Losos JB. Contingency and determinism in evolution: Replaying life's tape. *Science*.  
692 2018 Nov; <https://www.science.org/doi/abs/10.1126/science.aam5979>, publisher: American Association for  
693 the Advancement of Science.
- 694 **Bonsignori M**, Liao HX, Gao F, Williams WB, Alam SM, Montefiori DC, Haynes BF. Antibody-virus  
695 co-evolution in HIV infection: paths for HIV vaccine development. *Immunological Reviews*. 2017;  
696 275(1):145–160. <https://onlinelibrary.wiley.com/doi/abs/10.1111/imr.12509>, doi: 10.1111/imr.12509, eprint:  
697 <https://onlinelibrary.wiley.com/doi/pdf/10.1111/imr.12509>.
- 698 **Boyer S**, Biswas D, Soshee AK, Scaramozzino N, Nizak C, Rivoire O. Hierarchy and extremes in selections from  
699 pools of randomized proteins. *Proceedings of the National Academy of Sciences*. 2016 Mar; 113(13):3482–  
700 3487. <https://www.pnas.org/content/113/13/3482>, doi: 10.1073/pnas.1517813113, publisher: National  
701 Academy of Sciences Section: Physical Sciences.
- 702 **Brack C**, Hiramama M, Lenhard-Schuller R, Tonegawa S. A complete immunoglobulin gene is created by so-  
703 matic recombination. *Cell*. 1978 Sep; 15(1):1–14. <http://www.cell.com/article/0092867478900788/fulltext>,  
704 doi: 10.1016/0092-8674(78)90078-8, publisher: Elsevier.
- 705 **Chase JM**. Community assembly: when should history matter? *Oecologia*. 2003 Aug; 136(4):489–498. <http://link.springer.com/10.1007/s00442-003-1311-7>, doi: 10.1007/s00442-003-1311-7.
- 706  
707 **Chothia C**, Gelfand I, Kister A. Structural determinants in the sequences of immunoglobulin variable do-  
708 main11Edited by A. R. Fersht. *Journal of Molecular Biology*. 1998 May; 278(2):457–479. [https://www.](https://www.sciencedirect.com/science/article/pii/S0022283698916539)  
709 [sciencedirect.com/science/article/pii/S0022283698916539](https://www.sciencedirect.com/science/article/pii/S0022283698916539), doi: 10.1006/jmbi.1998.1653.

- 710 **Collins AM**, Jackson KJL. On being the right size: antibody repertoire formation in the mouse and human.  
711 Immunogenetics. 2018 Mar; 70(3):143–158. <https://doi.org/10.1007/s00251-017-1049-8>, doi: 10.1007/s00251-  
712 017-1049-8.
- 713 **Collins AM**, Yaari G, Shepherd AJ, Lees W, Watson CT. Germline immunoglobulin genes: Disease susceptibility  
714 genes hidden in plain sight? *Current Opinion in Systems Biology*. 2020 Dec; 24:100–108. [https://www.  
715 sciencedirect.com/science/article/pii/S2452310020300536](https://www.sciencedirect.com/science/article/pii/S2452310020300536), doi: 10.1016/j.coisb.2020.10.011.
- 716 **Crews S**, Griffin J, Huang H, Calame K, Hood L. A single VH gene segment encodes the immune response to  
717 phosphorylcholine: Somatic mutation is correlated with the class of the antibody. *Cell*. 1981 Jul; 25(1):59–66.  
718 <https://www.sciencedirect.com/science/article/pii/0092867481902312>, doi: 10.1016/0092-8674(81)90231-2.
- 719 **Cui A**, Niro RD, Heiden JAV, Briggs AW, Adams K, Gilbert T, O'Connor KC, Vigneault F, Shlomchik MJ, Kleinstein  
720 SH. A Model of Somatic Hypermutation Targeting in Mice Based on High-Throughput Ig Sequencing Data.  
721 *The Journal of Immunology*. 2016 Nov; 197(9):3566–3574. <http://www.jimmunol.org/content/197/9/3566>, doi:  
722 10.4049/jimmunol.1502263.
- 723 **Cumano A**, Rajewsky K. Clonal recruitment and somatic mutation in the generation of immunological memory  
724 to the hapten NP. *The EMBO Journal*. 1986 Oct; 5(10):2459–2468. [https://onlinelibrary.wiley.com/doi/abs/10.  
725 1002/j.1460-2075.1986.tb04522.x](https://onlinelibrary.wiley.com/doi/abs/10.1002/j.1460-2075.1986.tb04522.x), doi: 10.1002/j.1460-2075.1986.tb04522.x.
- 726 **Cumano A**, Rajewsky K. Structure of primary anti-(4-hydroxy-3-nitro-phenyl)acetyl (NP) antibodies in nor-  
727 mal and idiotypically suppressed C57BL/6 mice. *European Journal of Immunology*. 1985; 15(5):512–  
728 520. <https://onlinelibrary.wiley.com/doi/abs/10.1002/eji.1830150517>, doi: 10.1002/eji.1830150517, \_eprint:  
729 <https://onlinelibrary.wiley.com/doi/pdf/10.1002/eji.1830150517>.
- 730 **Das S**, Nozawa M, Klein J, Nei M. Evolutionary dynamics of the immunoglobulin heavy chain variable region  
731 genes in vertebrates. *Immunogenetics*. 2008 Jan; 60(1):47–55. <https://doi.org/10.1007/s00251-007-0270-2>,  
732 doi: 10.1007/s00251-007-0270-2.
- 733 **Desai MM**, Fisher DS. Beneficial Mutation–Selection Balance and the Effect of Linkage on Positive Selec-  
734 tion. *Genetics*. 2007 Jul; 176(3):1759–1798. <https://doi.org/10.1534/genetics.106.067678>, doi: 10.1534/ge-  
735 netics.106.067678.
- 736 **Di Niro R**, Lee SJ, Vander Heiden JA, Elsner RA, Trivedi N, Bannock JM, Gupta NT, Kleinstein SH, Vigneault F,  
737 Gilbert TJ, Meffre E, McSorley SJ, Shlomchik MJ. Salmonella Infection Drives Promiscuous B Cell Activation  
738 Followed by Extrafollicular Affinity Maturation. *Immunity*. 2015 Jul; 43(1):120–131. [https://www.sciencedirect.  
739 com/science/article/pii/S1074761315002575](https://www.sciencedirect.com/science/article/pii/S1074761315002575), doi: 10.1016/j.immuni.2015.06.013.
- 740 **Dunand CJH**, Wilson PC. Restricted, canonical, stereotyped and convergent immunoglobulin responses. *Philos-  
741 ophical Transactions of the Royal Society B: Biological Sciences*. 2015 Sep; 370(1676):20140238. [https://  
742 //royalsocietypublishing.org/doi/full/10.1098/rstb.2014.0238](https://royalsocietypublishing.org/doi/full/10.1098/rstb.2014.0238), doi: 10.1098/rstb.2014.0238.
- 743 **Eisen HN**, Siskind GW. Variations in Affinities of Antibodies during the Immune Response. *Biochemistry*. 1964  
744 Jul; 3(7):996–1008. <https://doi.org/10.1021/bi00895a027>, doi: 10.1021/bi00895a027, publisher: American  
745 Chemical Society.
- 746 **Elhanati Y**, Sethna Z, Marcou Q, Callan CG, Mora T, Walczak AM. Inferring processes underlying B-cell  
747 repertoire diversity. *Philosophical transactions of the Royal Society of London Series B, Biological sci-  
748 ences*. 2015 Sep; 370(1676):20140243. <http://rstb.royalsocietypublishing.org/content/370/1676/20140243>, doi:  
749 10.1098/rstb.2014.0243.
- 750 **Elsner RA**, Shlomchik MJ. Germinal Center and Extrafollicular B Cell Responses in Vaccination, Immunity, and  
751 Autoimmunity. *Immunity*. 2020 Dec; 53(6):1136–1150. [https://www.sciencedirect.com/science/article/pii/  
752 S1074761320304933](https://www.sciencedirect.com/science/article/pii/S1074761320304933), doi: 10.1016/j.immuni.2020.11.006.
- 753 **Flajnik MF**. Comparative analyses of immunoglobulin genes: surprises and portents. *Nature Reviews Im-  
754 munology*. 2002 Sep; 2(9):688. <https://www.nature.com/articles/nri889>, doi: 10.1038/nri889.
- 755 **Fukami T**. Historical Contingency in Community Assembly: Integrating Niches, Species Pools, and  
756 Priority Effects. *Annual Review of Ecology, Evolution, and Systematics*. 2015; 46(1):1–23. [https://  
757 //doi.org/10.1146/annurev-ecolsys-110411-160340](https://doi.org/10.1146/annurev-ecolsys-110411-160340), doi: 10.1146/annurev-ecolsys-110411-160340, \_eprint:  
758 <https://doi.org/10.1146/annurev-ecolsys-110411-160340>.

- 759 **Glanville J**, Kuo TC, von Büdingen HC, Guey L, Berka J, Sundar PD, Huerta G, Mehta GR, Oksenberg JR, Hauser SL,  
760 Cox DR, Rajpal A, Pons J. Naive antibody gene-segment frequencies are heritable and unaltered by chronic  
761 lymphocyte ablation. *Proceedings of the National Academy of Sciences of the United States of America*. 2011  
762 Dec; 108(50):20066–71. <http://www.pnas.org/content/108/50/20066.full>, doi: 10.1073/pnas.1107498108.
- 763 **Gould SJ**. *Wonderful Life: The Burgess Shale and the nature of history*. New York: Norton; 1989.
- 764 **Gould SJ**, Lewontin RC. The spandrels of San Marco and the Panglossian paradigm: a critique of  
765 the adaptationist programme. *Proceedings of the Royal Society of London Series B Biological Sci-*  
766 *ences*. 1979 Sep; 205(1161):581–598. <https://royalsocietypublishing.org/doi/abs/10.1098/rspb.1979.0086>, doi:  
767 10.1098/rspb.1979.0086, publisher: Royal Society.
- 768 **Greiff V**, Menzel U, Miho E, Weber C, Riedel R, Cook S, Valai A, Lopes T, Radbruch A, Winkler TH, Reddy ST. Sys-  
769 tems Analysis Reveals High Genetic and Antigen-Driven Predetermination of Antibody Repertoires through-  
770 out B Cell Development. *Cell Reports*. 2017; 19(7):1467–1478. doi: 10.1016/j.celrep.2017.04.054.
- 771 **Guthmiller JJ**, Han J, Li L, Freyn AW, Liu STH, Stovicek O, Stamper CT, Dugan HL, Tepora ME, Utset HA, Bitar  
772 DJ, Hamel NJ, Changrob S, Zheng NY, Huang M, Krammer F, Nachbagauer R, Palese P, Ward AB, Wilson PC.  
773 First exposure to the pandemic H1N1 virus induced broadly neutralizing antibodies targeting hemagglutinin  
774 head epitopes. *Science Translational Medicine*. 2021 Jun; 13(596). [https://stm.sciencemag.org/content/13/](https://stm.sciencemag.org/content/13/596/eabg4535)  
775 [596/eabg4535](https://stm.sciencemag.org/content/13/596/eabg4535), doi: 10.1126/scitranslmed.abg4535, publisher: American Association for the Advancement of  
776 Science Section: Research Article.
- 777 **Guthmiller JJ**, Han J, Utset HA, Li L, Lan LYL, Henry C, Stamper CT, McMahon M, O'Dell G, Fernández-Quintero  
778 ML, Freyn AW, Amanat F, Stovicek O, Gentles L, Richey ST, de la Peña AT, Rosado V, Dugan HL, Zheng NY,  
779 Tepora ME, et al. Broadly neutralizing antibodies target a haemagglutinin anchor epitope. *Nature*. 2022 Feb;  
780 602(7896):314–320. <https://www.nature.com/articles/s41586-021-04356-8>, doi: 10.1038/s41586-021-04356-8,  
781 number: 7896 Publisher: Nature Publishing Group.
- 782 **Harshbarger WD**, Deming D, Lockbaum GJ, Attatipaholkun N, Kamkaew M, Hou S, Somasundaran M, Wang  
783 JP, Finberg RW, Zhu QK, Schiffer CA, Marasco WA. Unique structural solution from a VH3-30 antibody  
784 targeting the hemagglutinin stem of influenza A viruses. *Nature Communications*. 2021 Jan; 12(1):559.  
785 <https://www.nature.com/articles/s41467-020-20879-6>, doi: 10.1038/s41467-020-20879-6, bandiera\_abtest: a  
786 Cc\_license\_type: cc\_by Cg\_type: Nature Research Journals Number: 1 Primary\_atype: Research Publisher:  
787 Nature Publishing Group Subject\_term: Influenza virus;X-ray crystallography Subject\_term\_id: influenza-  
788 virus;x-ray-crystallography.
- 789 **Hershberg U**, Shlomchik MJ. Differences in potential for amino acid change after mutation reveals distinct  
790 strategies for kappa and lambda light-chain variation. *Proceedings of the National Academy of Sciences of*  
791 *the United States of America*. 2006 Oct; 103(43):15963–8. <http://www.ncbi.nlm.nih.gov/pubmed/17038496>,  
792 doi: 10.1073/pnas.0607581103, publisher: National Academy of Sciences.
- 793 **Hoehn KB**, Turner JS, Miller FI, Jiang R, Pybus OG, Ellebedy AH, Kleinstein SH. Human B cell lineages engaged  
794 by germinal centers following influenza vaccination are measurably evolving. *Immunology*; 2021.
- 795 **Hozumi N**, Tonegawa S. Evidence for somatic rearrangement of immunoglobulin genes coding for variable  
796 and constant regions. *Proceedings of the National Academy of Sciences*. 1976 Oct; 73(10):3628–3632. <https://www.pnas.org/content/73/10/3628>, doi: 10.1073/pnas.73.10.3628.
- 798 **Hwang KK**, Trama AM, Kozink DM, Chen X, Wiehe K, Cooper AJ, Xia SM, Wang M, Marshall DJ, Whitesides J, Alam  
799 M, Tomaras GD, Allen SL, Rai KR, McKeating J, Catera R, Yan XJ, Chu CC, Kelsoe G, Liao HX, et al. IGHV1-69 B Cell  
800 Chronic Lymphocytic Leukemia Antibodies Cross-React with HIV-1 and Hepatitis C Virus Antigens as Well as  
801 Intestinal Commensal Bacteria. *PLOS ONE*. 2014 Mar; 9(3):e90725. [https://journals.plos.org/plosone/article?](https://journals.plos.org/plosone/article?id=10.1371/journal.pone.0090725)  
802 [id=10.1371/journal.pone.0090725](https://journals.plos.org/plosone/article?id=10.1371/journal.pone.0090725), doi: 10.1371/journal.pone.0090725, publisher: Public Library of Science.
- 803 **Jackson KJL**, Kidd MJ, Wang Y, Collins AM. The shape of the lymphocyte receptor repertoire: Lessons from the B  
804 cell receptor. *Frontiers in Immunology*. 2013; 4(SEP):1–12. doi: 10.3389/fimmu.2013.00263, ISBN: 1664-3224  
805 (Print)r1664-3224 (Linking).
- 806 **Jackson KL**, Liu Y, Roskin K, Glanville J, Hoh R, Seo K, Marshall E, Gurley T, Moody MA, Haynes B, Walter E,  
807 Liao HX, Albrecht R, García-Sastre A, Chaparro-Riggers J, Rajpal A, Pons J, Simen B, Hanczaruk B, Dekker C,  
808 et al. Human Responses to Influenza Vaccination Show Seroconversion Signatures and Convergent Antibody  
809 Rearrangements. *Cell Host & Microbe*. 2014 Jul; 16(1):105–114. [http://www.sciencedirect.com/science/article/](http://www.sciencedirect.com/science/article/pii/S193131281400184X)  
810 [pii/S193131281400184X](http://www.sciencedirect.com/science/article/pii/S193131281400184X), doi: 10.1016/j.chom.2014.05.013.

- 811 **Jacob J**, Kelsoe G, Rajewsky K, Weiss U. Intracloonal generation of antibody mutants in germinal centres. *Nature*. 1991 Dec; 354(6352):389–392. <https://www.nature.com/articles/354389a0>, doi: 10.1038/354389a0,  
812 bandiera\_abtest: a Cg\_type: Nature Research Journals Number: 6352 Primary\_atype: Research Publisher:  
813 Nature Publishing Group.
- 815 **Jardine JG**, Kulp DW, Havenar-Daughton C, Sarkar A, Briney B, Sok D, Sesterhenn F, Ereño-Orbea J, Kalyuzhnyi O,  
816 Deresa I, Hu X, Spencer S, Jones M, Georgeson E, Adachi Y, Kubitz M, deCamp AC, Julien JP, Wilson IA, Burton  
817 DR, et al. HIV-1 broadly neutralizing antibody precursor B cells revealed by germline-targeting immuno-  
818 gen. *Science*. 2016 Mar; 351(6280):1458–1463. <https://www.science.org/doi/full/10.1126/science.aad9195>, doi:  
819 10.1126/science.aad9195, publisher: American Association for the Advancement of Science.
- 820 **Kuraoka M**, Schmidt A, Nojima T, Feng F, Watanabe A, Kitamura D, Harrison S, Kepler T, Kelsoe G. Complex  
821 Antigens Drive Permissive Clonal Selection in Germinal Centers. *Immunity*. 2016 Mar; 44(3):542–552. <http://www.cell.com/article/S1074761316300486/fulltext>, doi: 10.1016/j.immuni.2016.02.010, publisher: Elsevier.  
822
- 823 **Li GM**, Chiu C, Wrammert J, McCausland M, Andrews SF, Zheng NY, Lee JH, Huang M, Qu X, Edupuganti S, Mul-  
824 ligan M, Das SR, Yewdell JW, Mehta aK, Wilson PC, Ahmed R. Pandemic H1N1 influenza vaccine induces a  
825 recall response in humans that favors broadly cross-reactive memory B cells. *Proceedings of the National*  
826 *Academy of Sciences*. 2012; 109(23):9047–9052. doi: 10.1073/pnas.1118979109, iSBN: 1118979109.
- 827 **Liao HX**, Lynch R, Zhou T, Gao F, Alam SM, Boyd SD, Fire AZ, Roskin KM, Schramm CA, Zhang Z, Zhu J, Shapiro  
828 L, Becker J, Benjamin B, Blakesley R, Bouffard G, Brooks S, Coleman H, Dekhtyar M, Gregory M, et al. Co-  
829 evolution of a broadly neutralizing HIV-1 antibody and founder virus. *Nature*. 2013; 496(7446):469–476.  
830 <http://dx.doi.org/10.1038/nature12053>, doi: 10.1038/nature12053, publisher: Nature Publishing Group, a  
831 division of Macmillan Publishers Limited. All Rights Reserved.
- 832 **Lin YR**, Parks KR, Weidle C, Naidu AS, Khechaduri A, Riker AO, Takushi B, Chun JH, Borst AJ, Veessler D, Stuart  
833 A, Agrawal P, Gray M, Pancera M, Huang PS, Stamatatos L. HIV-1 VRC01 Germline-Targeting Immunogens  
834 Select Distinct Epitope-Specific B Cell Receptors. *Immunity*. 2020 Oct; 53(4):840–851.e6. [https://www.cell.com/immunity/abstract/S1074-7613\(20\)30401-5](https://www.cell.com/immunity/abstract/S1074-7613(20)30401-5), doi: 10.1016/j.immuni.2020.09.007, publisher: Elsevier.  
835
- 836 **Lässig M**, Mustonen V, Walczak AM. Predicting evolution. *Nature Ecology & Evolution*. 2017 Feb; 1(3):1–9. <https://www.nature.com/articles/s41559-017-0077>, doi: 10.1038/s41559-017-0077, number: 3 Publisher: Nature  
837 Publishing Group.  
838
- 839 **Marchalonis JJ**, Schluter SF, Bernstein RM, Shen S, Edmundson AB. Phylogenetic Emergence and Molecular  
840 Evolution of the Immunoglobulin Family. In: Dixon FJ, editor. *Advances in Immunology*, vol. 70 Academic Press;  
841 1998.p. 417–506. <http://www.sciencedirect.com/science/article/pii/S0065277608603922>, doi: 10.1016/S0065-  
842 2776(08)60392-2.
- 843 **Mayer A**, Mora T, Rivoire O, Walczak AM. Diversity of immune strategies explained by adaptation to pathogen  
844 statistics. *Proceedings of the National Academy of Sciences*. 2016 Aug; 113(31):8630–8635. <https://www.pnas.org/content/113/31/8630>, doi: 10.1073/pnas.1600663113.  
845
- 846 **McCarthy KR**, Raymond DD, Do KT, Schmidt AG, Harrison SC. Affinity maturation in a human humoral response  
847 to influenza hemagglutinin. *Proceedings of the National Academy of Sciences*. 2019 Dec; 116(52):26745–  
848 26751. <https://www.pnas.org/content/116/52/26745>, doi: 10.1073/pnas.1915620116, publisher: National  
849 Academy of Sciences Section: Biological Sciences.
- 850 **McGuire AT**, Dreyer AM, Carbonetti S, Lippy A, Glenn J, Scheid JF, Mouquet H, Stamatatos L. Antigen  
851 modification regulates competition of broad and narrow neutralizing HIV antibodies. *Science*. 2014 Dec;  
852 346(6215):1380–3. <http://www.sciencemag.org/content/346/6215/1380.full>, doi: 10.1126/science.1259206.
- 853 **Mesin L**, Schiepers A, Ersching J, Barbulescu A, Cavazzoni CB, Angelini A, Okada T, Kurosaki T, Victora GD. Re-  
854 stricted Clonality and Limited Germinal Center Reentry Characterize Memory B Cell Reactivation by Boosting.  
855 *Cell*. 2020 Jan; 180(1):92–106.e11. <http://www.sciencedirect.com/science/article/pii/S0092867419313170>, doi:  
856 10.1016/j.cell.2019.11.032.
- 857 **Neumeier D**, Yermanos A, Agrafiotis A, Csepregi L, Chowdhury T, Ehling RA, Kuhn R, Roberto RBD, Tacchio  
858 MD, Antonioli R, Starkie D, Lightwood DJ, Oxenius A, Reddy ST. Phenotypic determinism and stochasticity  
859 in antibody repertoires of clonally expanded plasma cells. *bioRxiv*. 2021 Jul; p. 2021.07.16.452687. <https://www.biorxiv.org/content/10.1101/2021.07.16.452687v1>, doi: 10.1101/2021.07.16.452687, publisher: Cold  
860 Spring Harbor Laboratory Section: New Results.  
861

- 862 **Nielsen SCA**, Yang F, Jackson KJL, Hoh RA, Röltgen K, Jean GH, Stevens BA, Lee JY, Rustagi A, Rogers AJ, Powell  
863 AE, Hunter M, Najeeb J, Otrelo-Cardoso AR, Yost KE, Daniel B, Nadeau KC, Chang HY, Satpathy AT, Jardetzky  
864 TS, et al. Human B Cell Clonal Expansion and Convergent Antibody Responses to SARS-CoV-2. *Cell Host and*  
865 *Microbe*. 2020; 28(4):516–525.e5. doi: 10.1016/j.chom.2020.09.002.
- 866 **Ortega MR**, Spisak N, Mora T, Walczak AM, Modeling and predicting the overlap of B- and T-cell receptor reper-  
867 toires in healthy and SARS-CoV-2 infected individuals. *bioRxiv*; 2021. [https://www.biorxiv.org/content/10.1101/](https://www.biorxiv.org/content/10.1101/2021.12.17.473105v1)  
868 [2021.12.17.473105v1](https://www.biorxiv.org/content/10.1101/2021.12.17.473105v1), doi: 10.1101/2021.12.17.473105, pages: 2021.12.17.473105 Section: New Results.
- 869 **Pappas L**, Foglierini M, Piccoli L, Kallewaard NL, Turrini F, Silacci C, Fernandez-Rodriguez B, Agatic G, Giacchetto-  
870 Sasselli I, Pellicciotta G, Sallusto F, Zhu Q, Vicenzi E, Corti D, Lanzavecchia A. Rapid development of broadly  
871 influenza neutralizing antibodies through redundant mutations. *Nature*. 2014 Oct; 516(7531):418–422. [http:](http://dx.doi.org/10.1038/nature13764)  
872 [//dx.doi.org/10.1038/nature13764](http://dx.doi.org/10.1038/nature13764), doi: 10.1038/nature13764, publisher: Nature Publishing Group, a division  
873 of Macmillan Publishers Limited. All Rights Reserved.
- 874 **Park Y**, Metzger BPH, Thornton JW. Epistatic drift causes gradual decay of predictability in protein evolution. *Sci-*  
875 *ence*. 2022 May; 376(6595):823–830. <https://www.science.org/doi/10.1126/science.abn6895>, doi: 10.1126/sci-  
876 [ence.abn6895](https://www.science.org/doi/10.1126/science.abn6895), publisher: American Association for the Advancement of Science.
- 877 **Ralph DK**, Matsen FA. Consistency of VDJ Rearrangement and Substitution Parameters Enables Accurate B  
878 Cell Receptor Sequence Annotation. *PLoS computational biology*. 2016 Jan; 12(1):e1004409. [http://journals.](http://journals.plos.org/ploscompbiol/article?id=10.1371/journal.pcbi.1004409)  
879 [plos.org/ploscompbiol/article?id=10.1371/journal.pcbi.1004409](http://journals.plos.org/ploscompbiol/article?id=10.1371/journal.pcbi.1004409), doi: 10.1371/journal.pcbi.1004409, publisher:  
880 Public Library of Science.
- 881 **Ralph DK**, Matsen FA. Likelihood-Based Inference of B Cell Clonal Families. *PLOS Computational Biology*. 2016  
882 Oct; 12(10):e1005086. <https://journals.plos.org/ploscompbiol/article?id=10.1371/journal.pcbi.1005086>, doi:  
883 [10.1371/journal.pcbi.1005086](https://journals.plos.org/ploscompbiol/article?id=10.1371/journal.pcbi.1005086), publisher: Public Library of Science.
- 884 **Ralph DK**, Matsen FAM. Per-sample immunoglobulin germline inference from B cell receptor deep sequencing  
885 data. *PLOS Computational Biology*. 2019 Jul; 15(7):e1007133. [https://journals.plos.org/ploscompbiol/article?](https://journals.plos.org/ploscompbiol/article?id=10.1371/journal.pcbi.1007133)  
886 [id=10.1371/journal.pcbi.1007133](https://journals.plos.org/ploscompbiol/article?id=10.1371/journal.pcbi.1007133), doi: 10.1371/journal.pcbi.1007133.
- 887 **Robbiani DF**, Gaebler C, Muecksch F, Lorenzi JCC, Wang Z, Cho A, Agudelo M, Barnes CO, Gazumyan A, Finkin  
888 S, Hägglöf T, Oliveira TY, Viant C, Hurley A, Hoffmann HH, Millard KG, Kost RG, Cipolla M, Gordon K, Bian-  
889 chini F, et al. Convergent antibody responses to SARS-CoV-2 in convalescent individuals. *Nature*. 2020 Aug;  
890 584(7821):437–442. <https://www.nature.com/articles/s41586-020-2456-9>, doi: 10.1038/s41586-020-2456-9,  
891 number: 7821 Publisher: Nature Publishing Group.
- 892 **Rogozin IB**, Diaz M. Cutting Edge: DGYW/WRCH Is a Better Predictor of Mutability at G:C Bases in Ig Hy-  
893 permutation Than the Widely Accepted RGYW/WRCY Motif and Probably Reflects a Two-Step Activation-  
894 Induced Cytidine Deaminase-Triggered Process. *The Journal of Immunology*. 2004 Mar; 172(6):3382–3384.  
895 <http://www.jimmunol.org/content/172/6/3382.full>, doi: 10.4049/jimmunol.172.6.3382, publisher: American  
896 Association of Immunologists.
- 897 **Rogozin IB**, Kolchanov NA. Somatic hypermutagenesis in immunoglobulin genes II. Influence of neighbouring  
898 base sequences on mutagenesis. *Biochimica et Biophysica Acta (BBA) - Gene Structure and Expression*. 1992  
899 Nov; 1171(1):11–18. <http://www.sciencedirect.com/science/article/pii/016747819290134L>, doi: 10.1016/0167-  
900 [4781\(92\)90134-L](http://www.sciencedirect.com/science/article/pii/016747819290134L).
- 901 **Saini J**, Hershberg U. B cell Variable genes have evolved their codon usage to focus the targeted  
902 patterns of somatic mutation on the complementarity determining regions. *Molecular Immunol-*  
903 *ogy*. 2015 May; 65(1):157–167. <http://www.sciencedirect.com/science/article/pii/S0161589015000024>, doi:  
904 [10.1016/j.molimm.2015.01.001](http://www.sciencedirect.com/science/article/pii/S0161589015000024).
- 905 **Sakharkar M**, Rappazzo CG, Wieland-Alter WF, Hsieh CL, Wrapp D, Esterman ES, Kaku CI, Wec AZ, Geoghegan JC,  
906 McLellan JS, Connor RI, Wright PF, Walker LM. Prolonged evolution of the human B cell response to SARS-CoV-  
907 2 infection. *Science Immunology*. 2021 Feb; 6(56). <https://immunology.sciencemag.org/content/6/56/eabg6916>,  
908 doi: 10.1126/sciimmunol.abg6916, publisher: Science Immunology Section: Research Article.
- 909 **Sangesland M**, Lingwood D. Public Immunity: Evolutionary Spandrels for Pathway-Amplifying Protective Anti-  
910 bodies. *Frontiers in Immunology*. 2021; 12. <https://www.frontiersin.org/article/10.3389/fimmu.2021.708882>.
- 911 **Sangesland M**, Ronsard L, Kazer SW, Bals J, Boyoglu-Barnum S, Yousif AS, Barnes R, Feldman J, Quirindongo-  
912 Crespo M, McTamney PM, Rohrer D, Lonberg N, Chackerian B, Graham BS, Kanekiyo M, Shalek AK, Lingwood  
913 D. Germline-Encoded Affinity for Cognate Antigen Enables Vaccine Amplification of a Human Broadly Neu-  
914 tralizing Response against Influenza Virus. *Immunity*. 2019 Oct; 51(4):735–749.e8. [https://www.sciencedirect.](https://www.sciencedirect.com/science/article/pii/S1074761319303723)  
915 [com/science/article/pii/S1074761319303723](https://www.sciencedirect.com/science/article/pii/S1074761319303723), doi: 10.1016/j.immuni.2019.09.001.



- 916 **Sangesland M**, Yousif AS, Ronsard L, Kazer SW, Zhu AL, Gatter GJ, Hayward MR, Barnes RM, Quirindongo-  
917 Crespo M, Rohrer D, Lonberg N, Kwon D, Shalek AK, Lingwood D. A Single Human VH-gene Allows  
918 for a Broad-Spectrum Antibody Response Targeting Bacterial Lipopolysaccharides in the Blood. *Cell Re-*  
919 *ports*. 2020 Aug; 32(8):108065. <https://www.sciencedirect.com/science/article/pii/S2211124720310500>, doi:  
920 10.1016/j.celrep.2020.108065.
- 921 **Schulz S**, Boyer S, Smerlak M, Cocco S, Monasson R, Nizak C, Rivoire O. Parameters and determinants of  
922 responses to selection in antibody libraries. *PLOS Computational Biology*. 2021 Mar; 17(3):e1008751. <https://journals.plos.org/ploscompbiol/article?id=10.1371/journal.pcbi.1008751>, doi: 10.1371/journal.pcbi.1008751,  
923 publisher: Public Library of Science.
- 925 **Sealy R**, Surman S, Hurwitz JL, Coleclough C. Antibody response to influenza infection of mice: different pat-  
926 terns for glycoprotein and nucleocapsid antigens. *Immunology*. 2003; 108(4):431–439. <https://onlinelibrary.wiley.com/doi/abs/10.1046/j.1365-2567.2003.01615.x>, doi: <https://doi.org/10.1046/j.1365-2567.2003.01615.x>,  
927 [\\_eprint: https://onlinelibrary.wiley.com/doi/pdf/10.1046/j.1365-2567.2003.01615.x](https://onlinelibrary.wiley.com/doi/pdf/10.1046/j.1365-2567.2003.01615.x).
- 929 **Shiroishi M**, Ito Y, Shimokawa K, Lee JM, Kusakabe T, Ueda T. Structure–function analyses of a stereotypic  
930 rheumatoid factor unravel the structural basis for germline-encoded antibody autoreactivity. *Journal of*  
931 *Biological Chemistry*. 2018 May; 293(18):7008–7016. [https://www.jbc.org/article/S0021-9258\(20\)41075-0/](https://www.jbc.org/article/S0021-9258(20)41075-0/abstract)  
932 [abstract](https://www.jbc.org/article/S0021-9258(20)41075-0/abstract), doi: 10.1074/jbc.M117.814475, publisher: Elsevier.
- 933 **Starr TN**, Thornton JW. Epistasis in protein evolution. *Protein Science*. 2016; 25(7):1204–  
934 1218. <https://onlinelibrary.wiley.com/doi/abs/10.1002/pro.2897>, doi: 10.1002/pro.2897, [\\_eprint:](https://onlinelibrary.wiley.com/doi/pdf/10.1002/pro.2897)  
935 <https://onlinelibrary.wiley.com/doi/pdf/10.1002/pro.2897>.
- 936 **Turner JS**, Zhou JQ, Han J, Schmitz AJ, Rizk AA, Alsoussi WB, Lei T, Amor M, McIntire KM, Meade P, Strohmeier S,  
937 Brent RI, Richey ST, Haile A, Yang YR, Klebert MK, Suessen T, Teefey S, Presti RM, Krammer F, et al. Human ger-  
938 minal centres engage memory and naive B cells after influenza vaccination. *Nature*. 2020 Oct; 586(7827):127–  
939 132. <http://www.nature.com/articles/s41586-020-2711-0>, doi: 10.1038/s41586-020-2711-0.
- 940 **Vander Heiden JA**, Yaari G, Uduman M, Stern JNH, O'Connor KC, Hafler DA, Vigneault F, Kleinstein SH. pRESTO:  
941 a toolkit for processing high-throughput sequencing raw reads of lymphocyte receptor repertoires. *Bioin-*  
942 *formatics*. 2014 Jul; 30(13):1930–1932. <https://doi.org/10.1093/bioinformatics/btu138>, doi: 10.1093/bioinfor-  
943 [matics/btu138](https://doi.org/10.1093/bioinformatics/btu138).
- 944 **Viant C**, Weymar GHJ, Escolano A, Chen S, Hartweg H, Cipolla M, Gazumyan A, Nussenzweig MC. Antibody  
945 Affinity Shapes the Choice between Memory and Germinal Center B Cell Fates. *Cell*. 2020 Nov; 183(5):1298–  
946 1311.e11. [https://www.cell.com/cell/abstract/S0092-8674\(20\)31304-0](https://www.cell.com/cell/abstract/S0092-8674(20)31304-0), doi: 10.1016/j.cell.2020.09.063, pub-  
947 [lisher: Elsevier](https://www.cell.com/cell/abstract/S0092-8674(20)31304-0).
- 948 **Victoria GD**, Nussenzweig MC. Germinal Centers. *Annual Review of Immunology*. 2012; 30(1):429–457. doi:  
949 10.1146/annurev-immunol-020711-075032, ISBN: 10.1146/annurev-immunol-020711-075032.
- 950 **Voss WN**, Hou YJ, Johnson NV, Delidakis G, Kim JE, Javanmardi K, Horton AP, Bartzoka F, Paresi CJ, Tanno Y, Chou  
951 CW, Abbasi SA, Pickens W, George K, Boutz DR, Towers DM, McDaniel JR, Billick D, Goike J, Rowe L, et al. Preva-  
952 lent, protective, and convergent IgG recognition of SARS-CoV-2 non-RBD spike epitopes. *Science*. 2021 May;  
953 <https://science.sciencemag.org/content/early/2021/05/03/science.abg5268>, doi: 10.1126/science.abg5268, pub-  
954 [lisher: American Association for the Advancement of Science Section: Report](https://science.sciencemag.org/content/early/2021/05/03/science.abg5268).
- 955 **Watson CT**, Glanville J, Marasco WA. The Individual and Population Genetics of Antibody Immunity. *Trends in*  
956 *Immunology*. 2017 Jul; 38(7):459–470. <https://www.sciencedirect.com/science/article/pii/S1471490617300625>,  
957 doi: 10.1016/j.it.2017.04.003.
- 958 **Wei L**, Chahwan R, Wang S, Wang X, Pham PT, Goodman MF, Bergman A, Scharff MD, MacCarthy T. Over-  
959 lapping hotspots in CDRs are critical sites for V region diversification. *Proceedings of the National*  
960 *Academy of Sciences*. 2015; p. E728–E737. <http://www.pnas.org/lookup/doi/10.1073/pnas.1500788112>, doi:  
961 10.1073/pnas.1500788112, ISBN: 1500788112.
- 962 **West AP**, Diskin R, Nussenzweig MC, Bjorkman PJ. Structural basis for germ-line gene usage of a potent class of  
963 antibodies targeting the CD4-binding site of HIV-1 gp120. *Proceedings of the National Academy of Sciences*.  
964 2012 Jul; 109(30):E2083–E2090. <https://www.pnas.org/content/109/30/E2083>, doi: 10.1073/pnas.1208984109,  
965 publisher: National Academy of Sciences Section: PNAS Plus.
- 966 **Xie VC**, Pu J, Metzger BP, Thornton JW, Dickinson BC. Contingency and chance erase necessity in the experi-  
967 mental evolution of ancestral proteins. *eLife*. 2021 Jun; 10:e67336. <https://doi.org/10.7554/eLife.67336>, doi:  
968 10.7554/eLife.67336, publisher: eLife Sciences Publications, Ltd.

- 969 **Yaari G**, Vander Heiden JA, Uduman M, Gadala-Maria D, Gupta N, Stern JNH, O'Connor KC, Hafler DA, Laser-  
970 son U, Vigneault F, Kleinstein SH. Models of somatic hypermutation targeting and substitution based  
971 on synonymous mutations from high-throughput immunoglobulin sequencing data. *Frontiers in Im-*  
972 *munology*. 2013 Jan; 4:358. <http://journal.frontiersin.org/article/10.3389/fimmu.2013.00358/abstract>, doi:  
973 10.3389/fimmu.2013.00358, publisher: Frontiers.
- 974 **Yeung YA**, Foletti D, Deng X, Abdiche Y, Strop P, Glanville J, Pitts S, Lindquist K, Sundar PD, Sirota M, Hasa-  
975 Moreno A, Pham A, Melton Witt J, Ni I, Pons J, Shelton D, Rajpal A, Chaparro-Riggers J. Germline-encoded neu-  
976 tralization of a *Staphylococcus aureus* virulence factor by the human antibody repertoire. *Nature Communi-*  
977 *cations*. 2016 Nov; 7(1):13376. <https://www.nature.com/articles/ncomms13376>, doi: 10.1038/ncomms13376,  
978 bandiera\_abtest: a Cc\_license\_type: cc\_by Cg\_type: Nature Research Journals Number: 1 Primary\_atype:  
979 Research Publisher: Nature Publishing Group Subject\_term: Antibodies;Bacterial host response;X-ray crys-  
980 tallography Subject\_term\_id: antibodies;bacterial-host-response;x-ray-crystallography.
- 981 **Yewdell WT**, Smolkin RM, Belcheva KT, Mendoza A, Michaels AJ, Cols M, Angeletti D, Yewdell JW, Chaudhuri J.  
982 Temporal dynamics of persistent germinal centers and memory B cell differentiation following respiratory  
983 virus infection. *Cell Reports*. 2021 Nov; 37(6). [https://www.cell.com/cell-reports/abstract/S2211-1247\(21\)](https://www.cell.com/cell-reports/abstract/S2211-1247(21)01438-8)  
984 01438-8, doi: 10.1016/j.celrep.2021.109961, publisher: Elsevier.
- 985 **Yuan M**, Liu H, Wu NC, Lee CCD, Zhu X, Zhao F, Huang D, Yu W, Hua Y, Tien H, Rogers TF, Landais E, Sok D, Jardine  
986 JG, Burton DR, Wilson IA. Structural basis of a shared antibody response to SARS-CoV-2. *Science*. 2020 Aug;  
987 369(6507):1119–1123. <https://science.sciencemag.org/content/369/6507/1119>, doi: 10.1126/science.abd2321,  
988 publisher: American Association for the Advancement of Science Section: Report.

## 989 **Supplementary information**

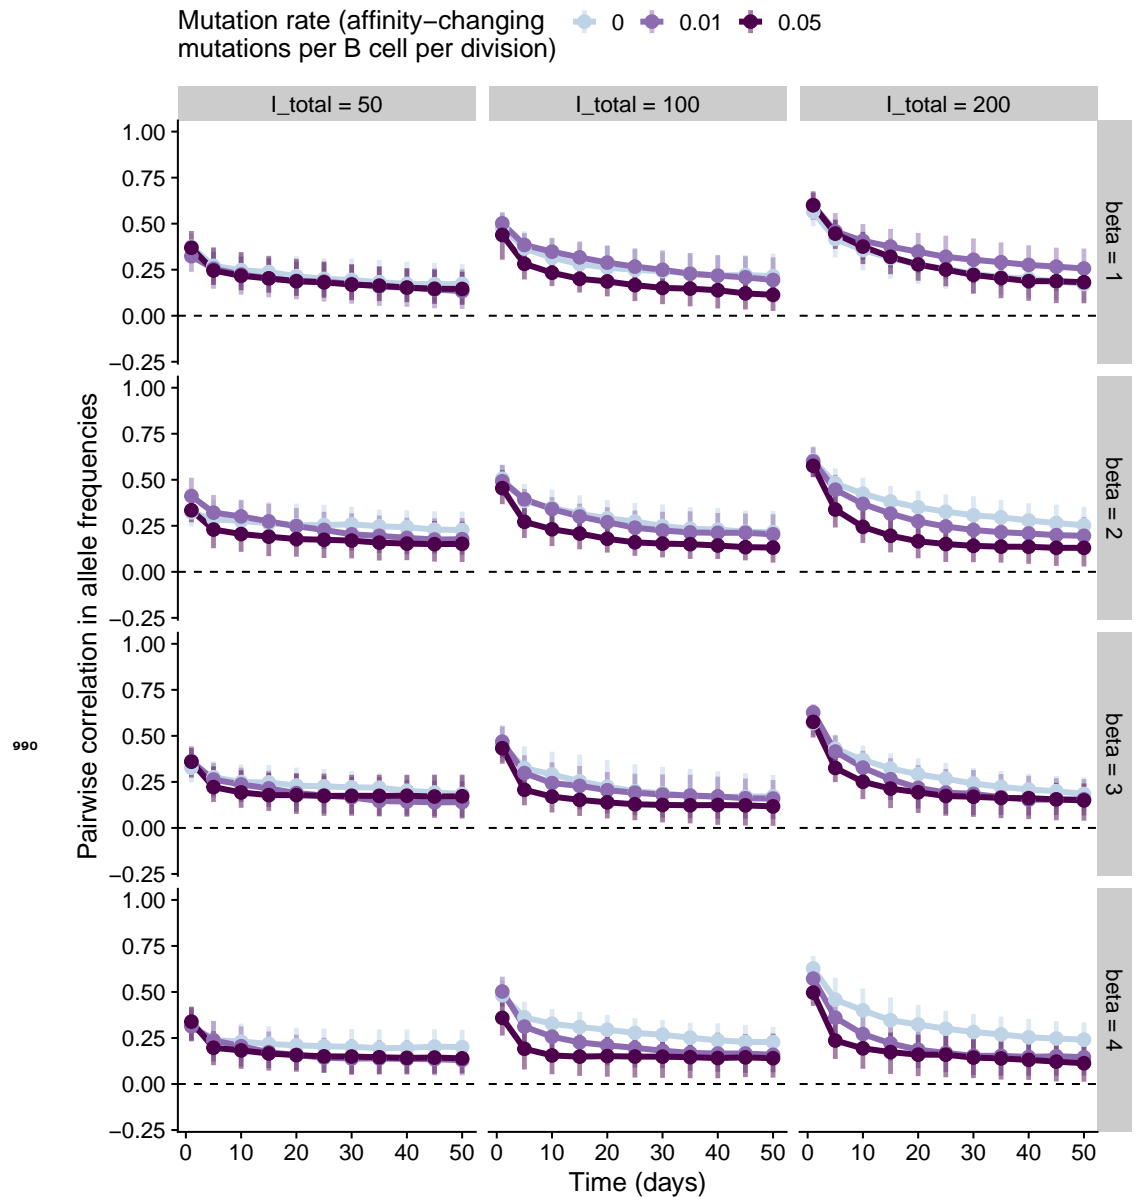

**Figure 2-Figure supplement 1.** Correlation in allele frequencies between individuals simulated under a scenario where all alleles have identical naive affinity distributions and mutation rates. For each panel, we simulated 20 individuals, each with 15 germinal centers. We varied the rate of affinity-changing mutations per B cell per division (colors), the expected total number of B cell lineages seeding each germinal center ( $I_{total}$ , columns) and the standard deviation ( $\beta$ , rows) of the effect size of mutations (which is normally distributed with mean 0). Other parameters were set to the default values in Table 1. Points and vertical bars show the median and the 1st and 4th quartiles computed across all pairs of individuals at each time point.

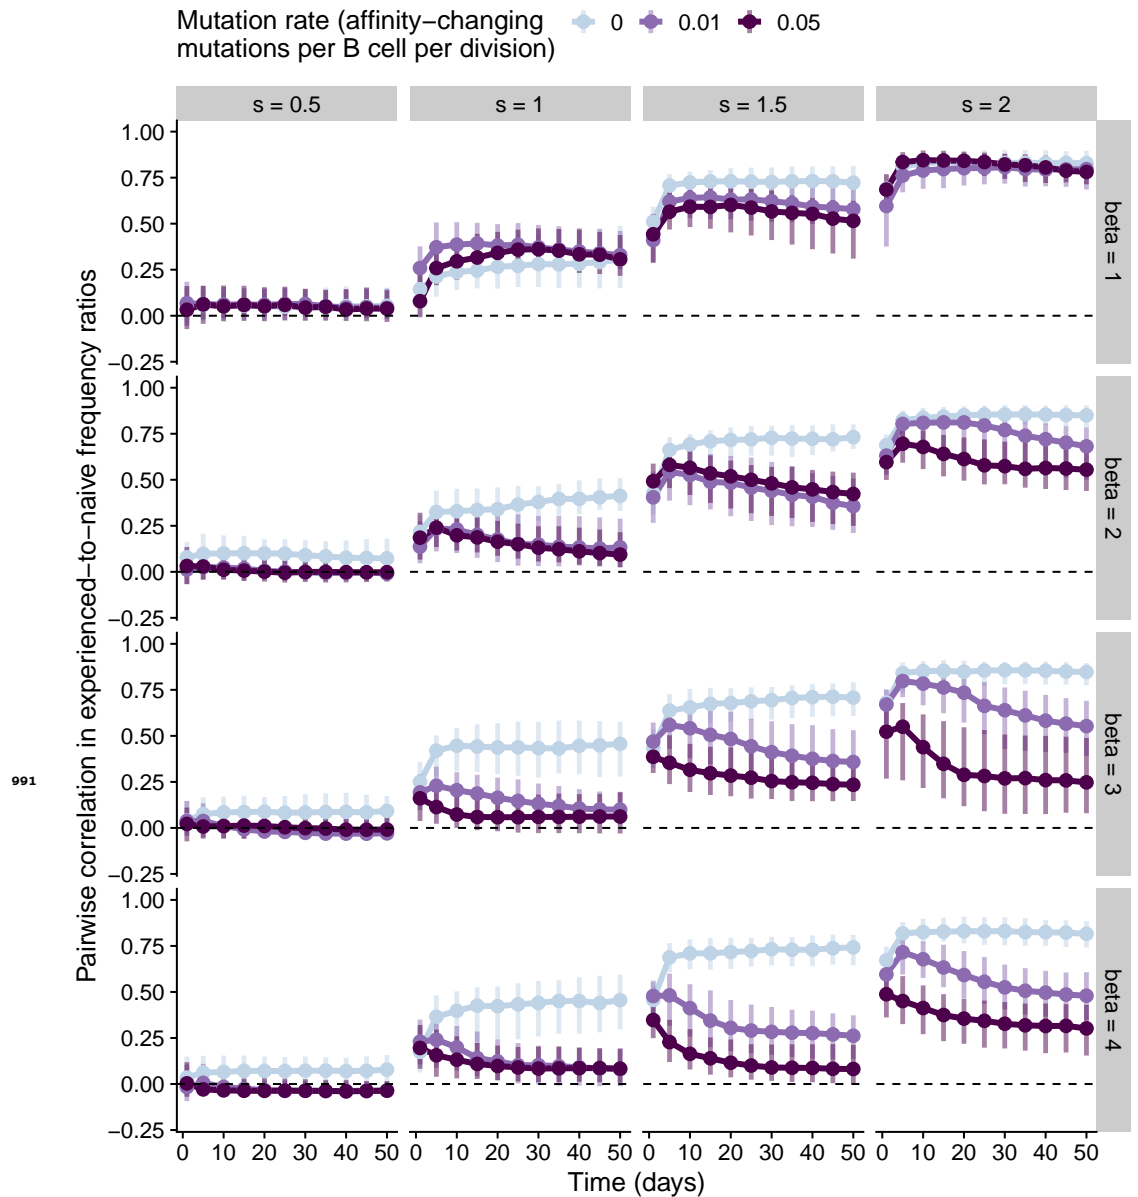

**Figure 2-Figure supplement 2.** Correlation in allele frequency deviations from the naive repertoire simulated in a scenario where most alleles have identical affinity distributions but five alleles have a different distribution with a higher mean. We measured frequency deviations as the ratio of an allele's frequency across all germinal centers in an individual and its frequency in the individual's naive repertoire. For each panel, we simulated 20 individuals, each with 15 germinal centers. We varied the rate of affinity-changing mutations per B cell per division (colors), the increment in average affinity for high-affinity alleles ( $s$ , columns) and the standard deviation ( $\beta$ , rows) of the effect size of mutations (which is normally distributed with mean 0). Other parameters were set to the default values in Table 1. Points and vertical bars show the median and the 1st and 4th quartiles computed across all pairs of individuals at each time point.

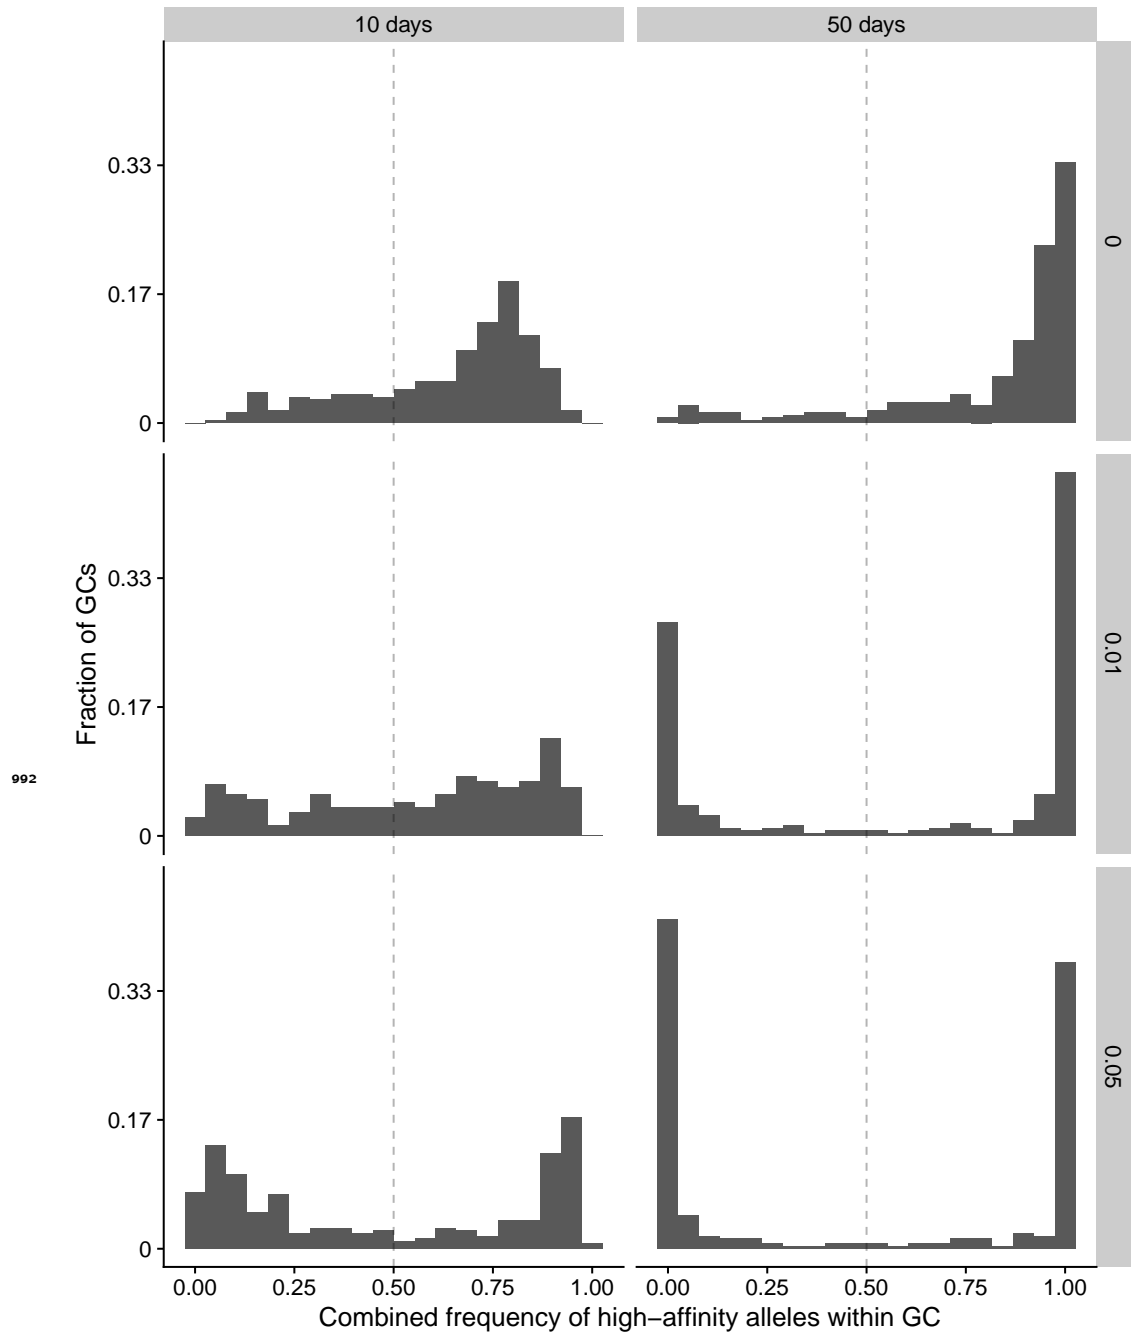

**Figure 2-Figure supplement 3.** Combined frequency of high-affinity alleles within germinal centers in simulations. Columns show the distribution across germinal centers early (10 days) and late (50 days) in the response. Rows show different somatic hypermutation rates (affinity-changing mutations per B cell per division). For each row, we simulated 20 individuals, each with 15 germinal centers. The same five alleles in all individuals were chosen to have their average naive affinity increased by  $s = 1.5$ . Other parameters were set to the default values in Table 1.

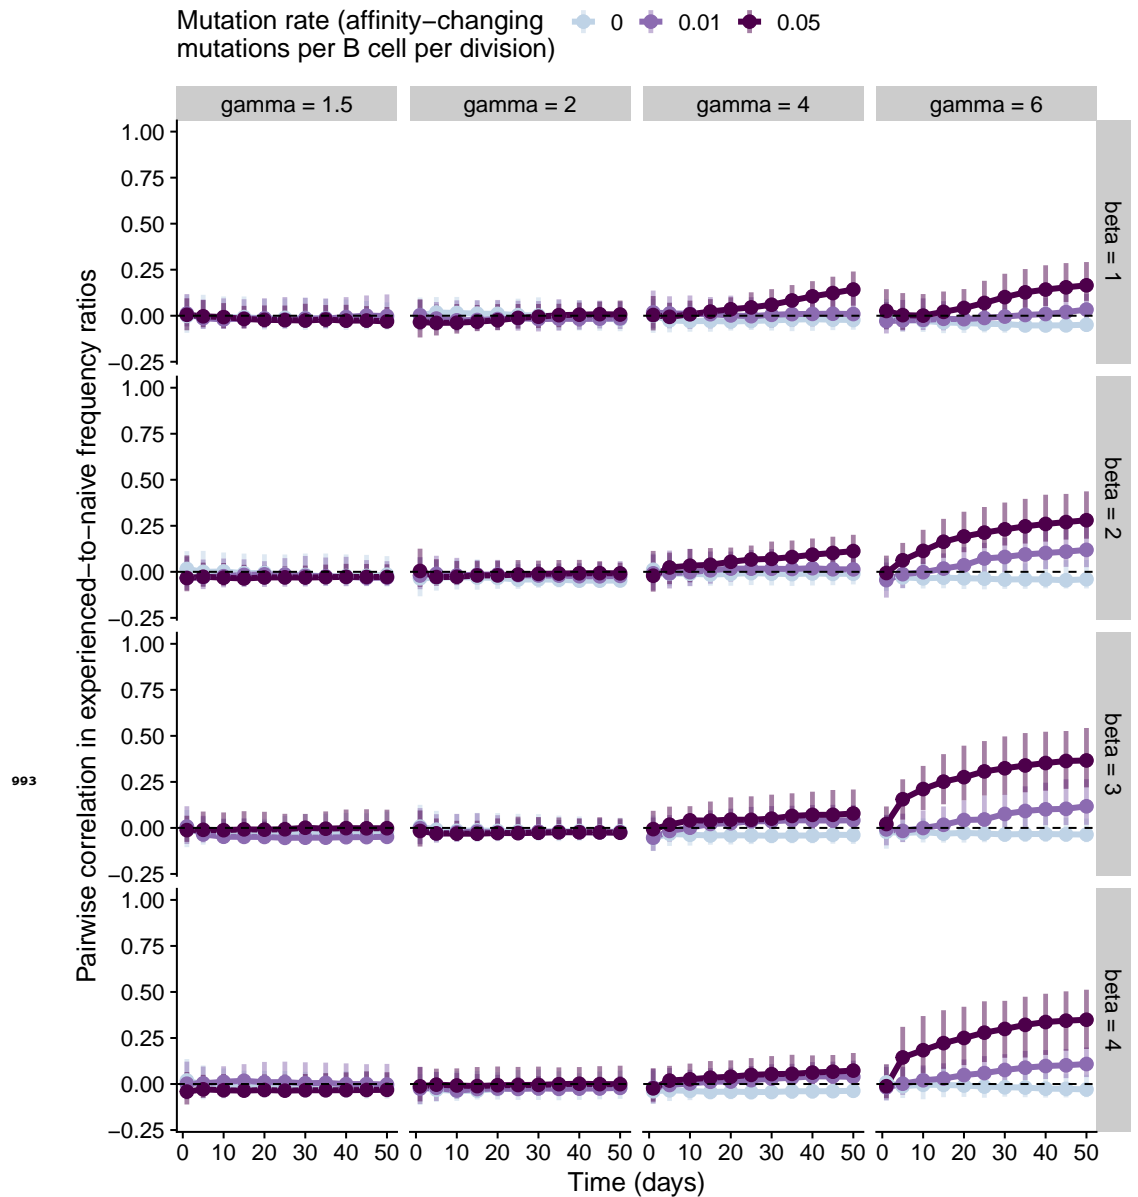

**Figure 2-Figure supplement 4.** Correlation in allele frequency deviations from the naive repertoire simulated in a scenario where all alleles have identical affinity distributions but five alleles have a higher mutation rate than the others. We measured frequency deviations as the ratio of an allele's frequency across all germinal centers in an individual and its frequency in the individual's naive repertoire. For each panel, we simulated 20 individuals, each with 15 germinal centers. We varied the rate of affinity-changing mutations per B cell per division (colors), the factor by which the mutation rate increases in high-mutability alleles ( $\gamma$ , columns) and the standard deviation ( $\beta$ , rows) of the effect size of mutations (which is normally distributed with mean 0). Other parameters were set to the default values in Table 1. Points and vertical bars show the median and the 1st and 4th quartiles computed across all pairs of individuals at each time point.

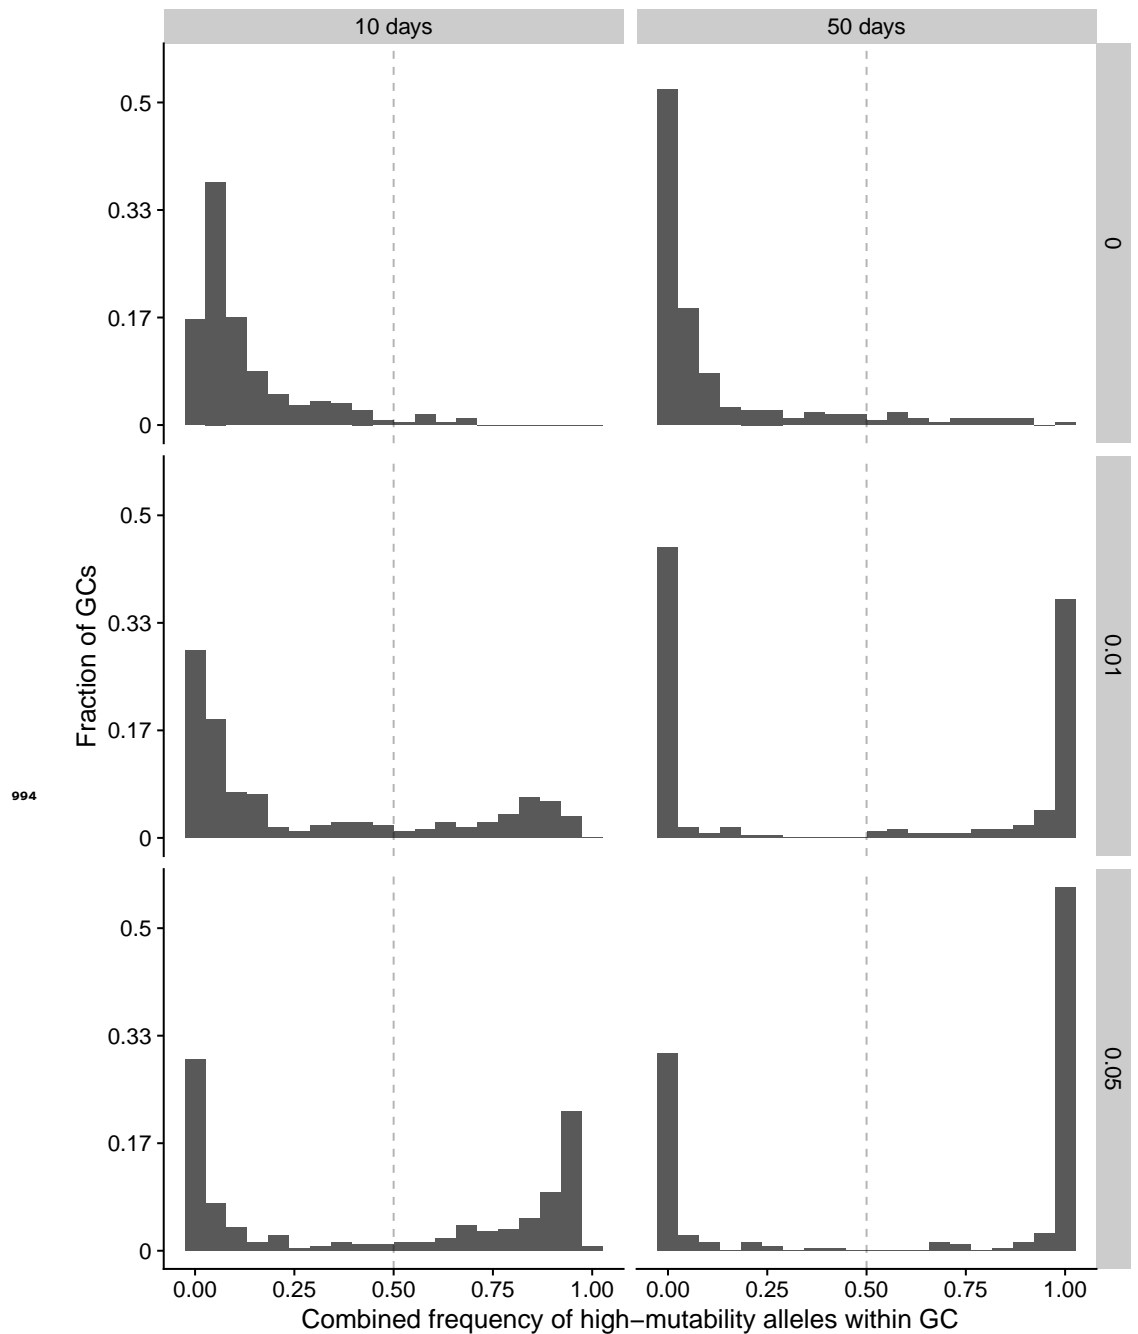

**Figure 2-Figure supplement 5.** Combined frequency of high-mutability alleles within germinal centers in simulations. Columns show the distribution across germinal centers early (10 days) and late (50 days) in the response. Rows show different somatic hypermutation rates (affinity-changing mutations per B cell per division). For each row, we simulated 20 individuals, each with 15 germinal centers. The same five alleles in all individuals were chosen to have their mutation rate multiplied by a factor  $\gamma = 6$  relative to other alleles. Other parameters were set to the default values in Table 1.



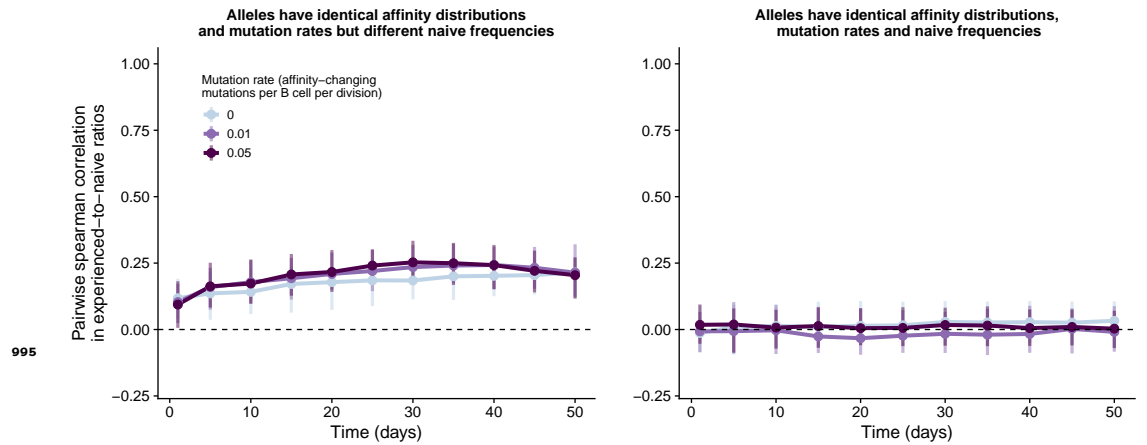

**Figure 2-Figure supplement 6.** Between-individual correlation in allele frequency deviations from the naive repertoire simulated with (left) and without (right) differences between alleles in their naive repertoire frequencies, measured using the Spearman coefficient. In both cases, all alleles had the same affinity distributions and mutation rates. For each panel, we simulated 20 individuals, each with 15 germinal centers. We varied the rate of affinity-changing mutations per B cell per division (colors). Other parameters were set to the default values in Table 1. Points and vertical bars represent the median and the 1st and 4th quartiles, respectively.

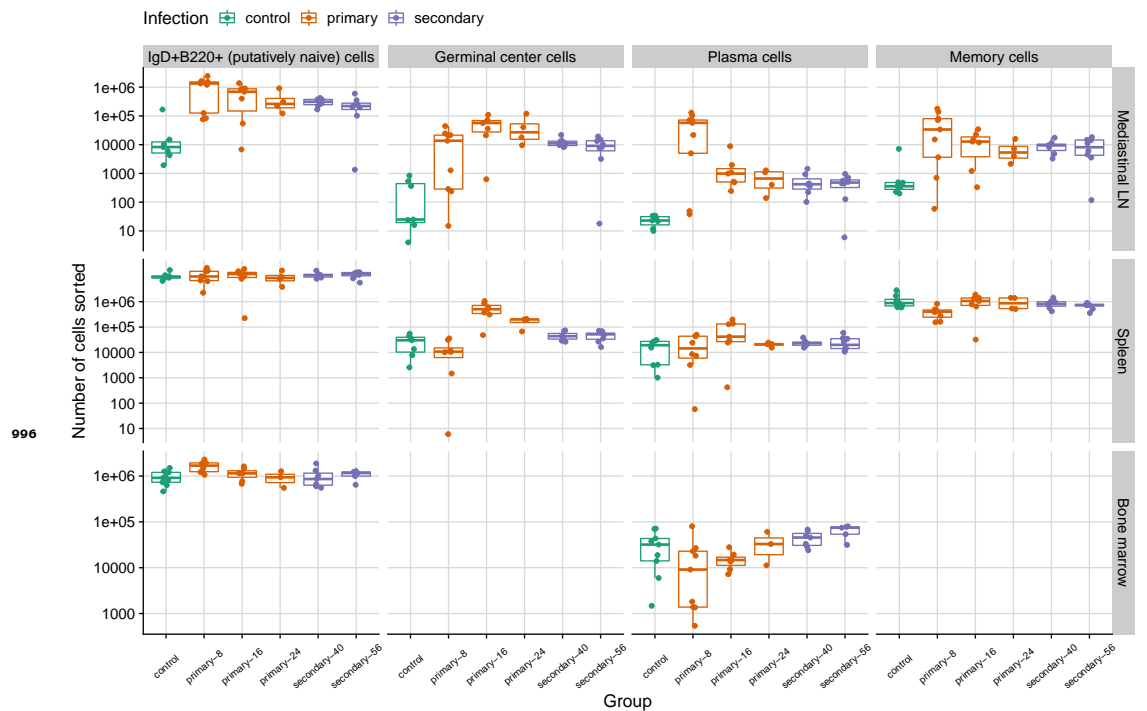

**Figure 3-Figure supplement 1.** Number of cells sorted from different tissues in mice infected with influenza and in uninfected controls. Infected mice were subject to one or two infections and sacrificed at 8, 16, 24, 40 or 56 days after primary infection. Mice from the last two time points were given a second infection 32 days after the first one.

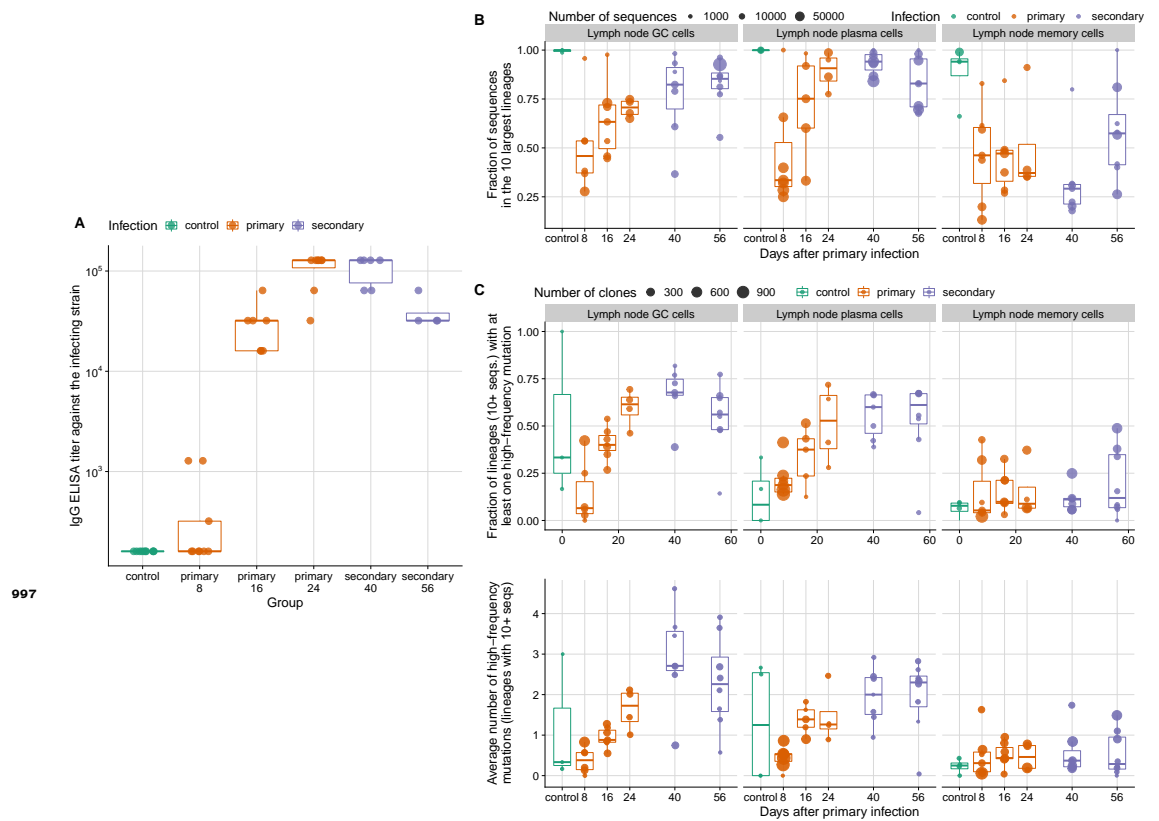

**Figure 3-Figure supplement 2.** Evidence of increased B cell evolution and competition over time in the infected mice. **(A)** Serum antibody titers against the infecting strain measured by ELISA. **(B)** Total fraction of reads in influenza-induced populations represented by the ten largest B lineages in each mouse. The ten largest lineages were chosen based on the number of reads each lineage had in the respective cell type in the lymph node (not the total number of reads each lineage had across all tissue and cell types). **(C)** Fraction of lineages with at least one amino acid mutation at frequency 50% of higher in the lineage (top panel), and the average number of such high-frequency mutations per lineage within each mouse (bottom panel). Mutation frequencies in each lineage were calculated relative to the lineage's number of reads in the respective tissue and cell type combinations. For these calculations, only lineages with at least 10 reads were considered.

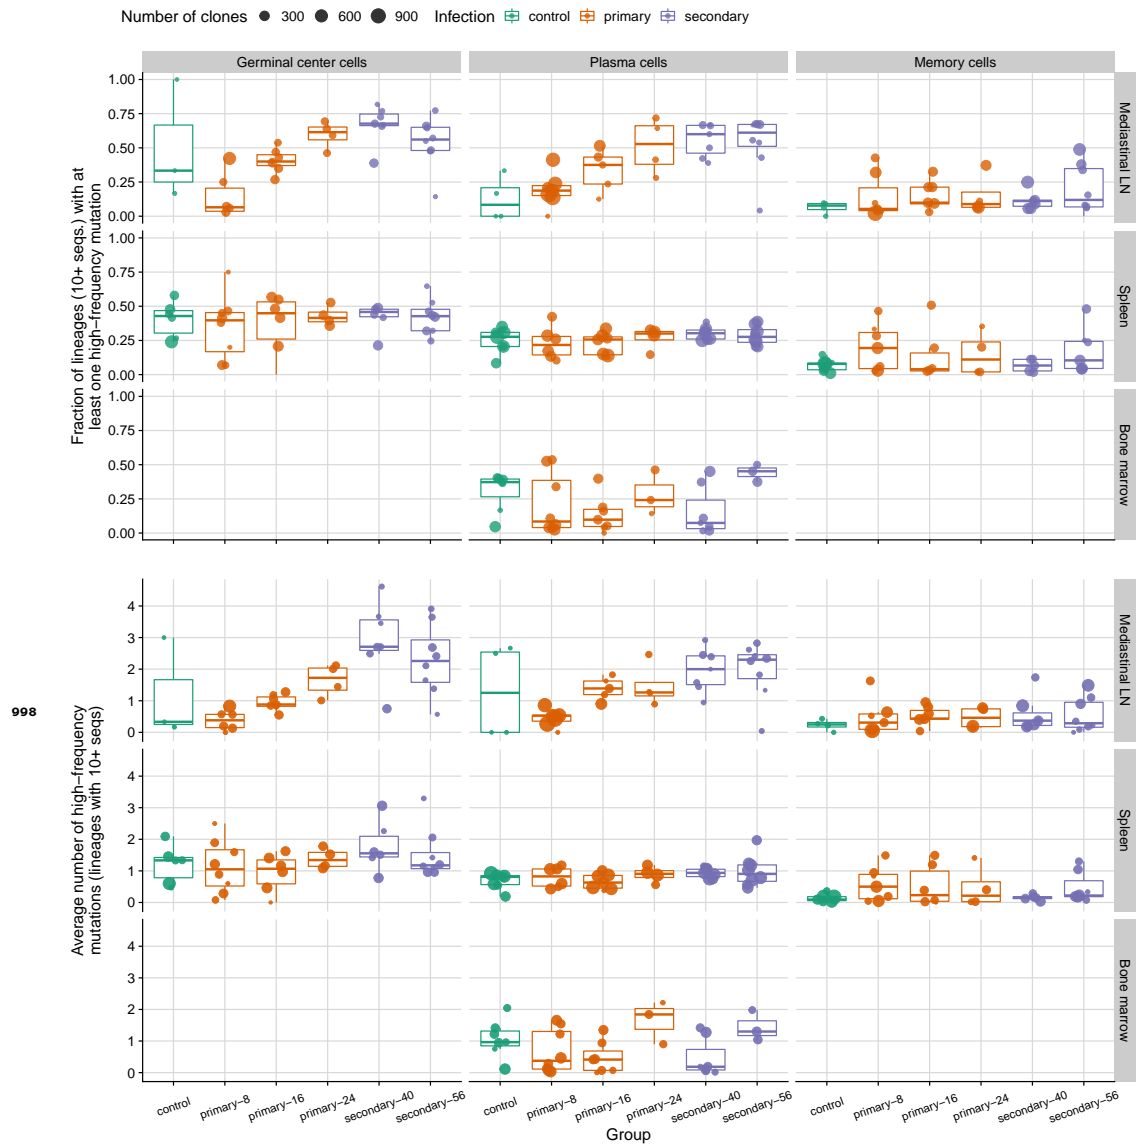

**Figure 3-Figure supplement 3.** Increasing dominance by mutated clones over time is evident in lymph nodes but not in other tissues. Fraction of clones with at least one amino acid mutation at frequency 50% or higher (top panel) and the average number of such high-frequency mutations per clone (bottom panel) for different cell types and tissues. Mutation frequencies in each clone were calculated relative to the clone's number of reads in the respective tissue and cell type combinations (not the total number of reads in the clone across all subtypes and tissues). For each combination of cell type and tissue, each point corresponds to a mouse. Only clones with at least ten reads were considered.

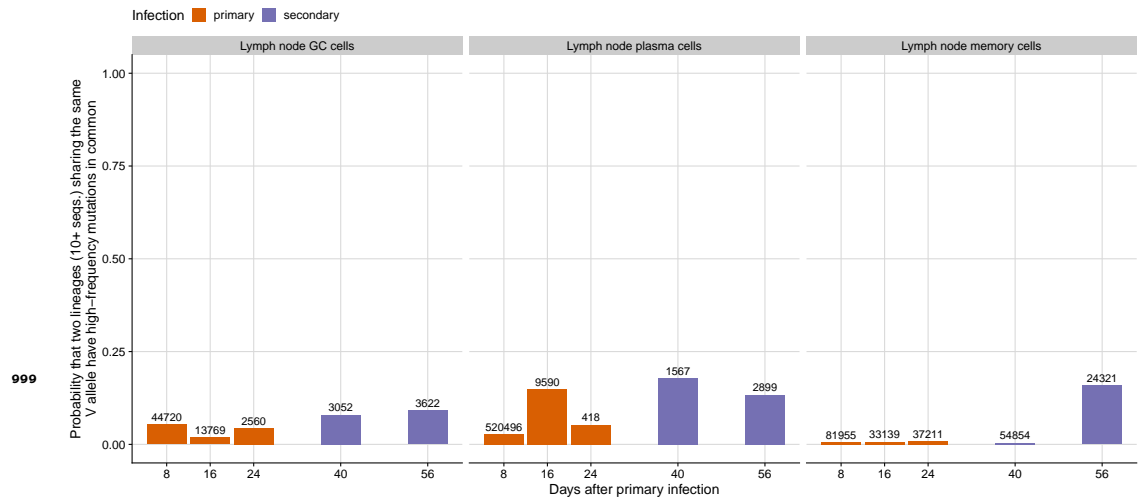

**Figure 3–Figure supplement 4.** Probability that two B cell lineages sharing the same heavy chain V allele have high-frequency mutations in common. Panels represent B cell types from the lymph node of mice infected with influenza virus (GC: germinal center cells, PC: plasma cells, mem: memory cells). High-frequency mutations were those with a frequency of 50% within the lineage (considering lineage reads in each cell type). The numbers above the bars indicate the number of lineage pairs being compared (pairs were from either the same mouse or difference mice). We restricted the analysis to lineages with at least 10 reads.

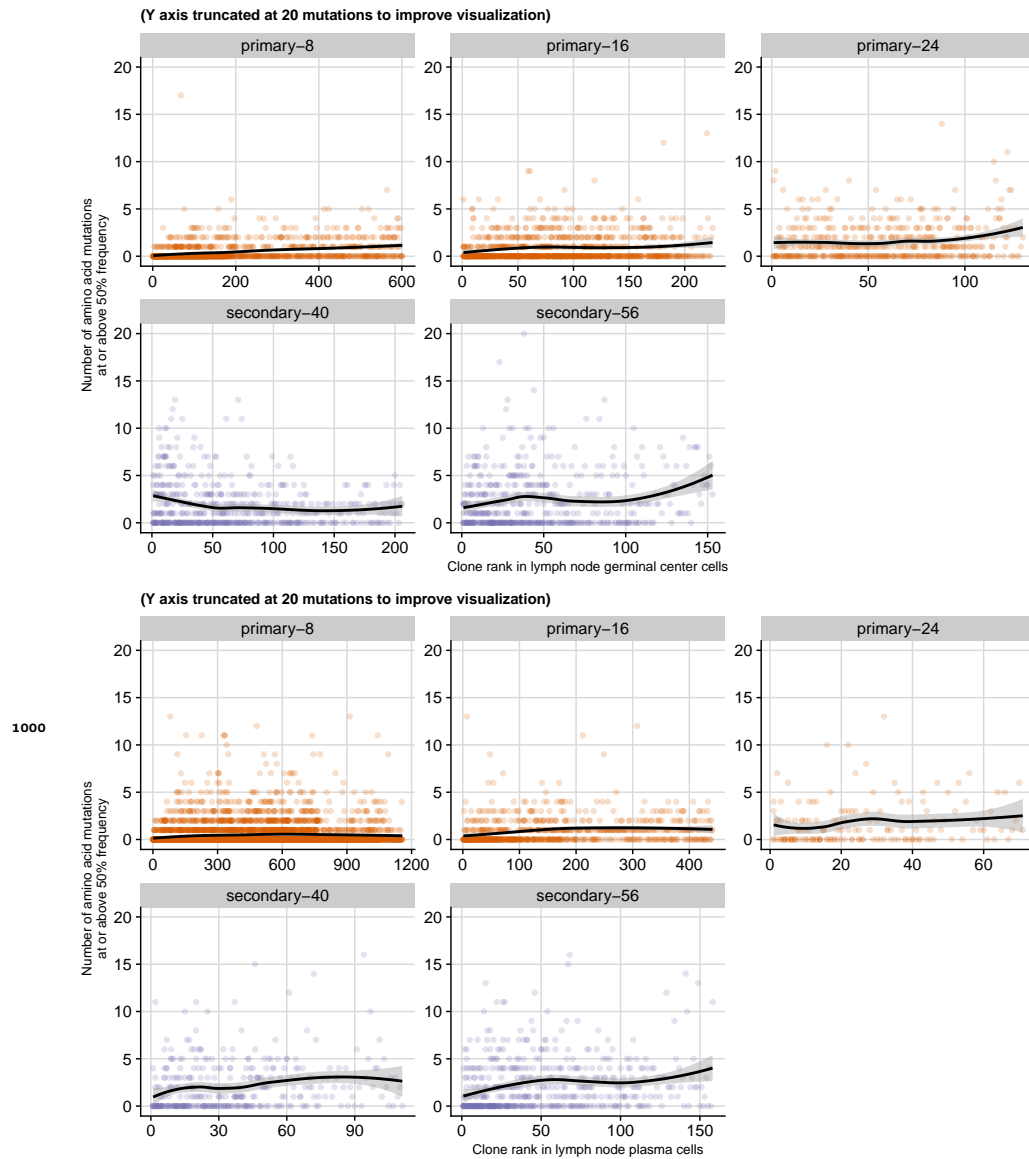

**Figure 3-Figure supplement 5.** Number of high frequency mutations as a function of clone rank in lymph node germinal center cells (top) and lymph node plasma cells (bottom). Each point represents a clone. Mice from each time point (8, 16, 24, 40 and 56 days after primary infection with influenza) were pooled together in each panel. Clone rank was determined based on the number of reads each clone had in the respective population (lymph node germinal center cells or lymph node plasma cells), not the total number of reads in the clone across all cell types and tissues (the largest clone was assigned rank 1). The solid line is a locally estimated scatterplot smoothing (LOESS) spline.

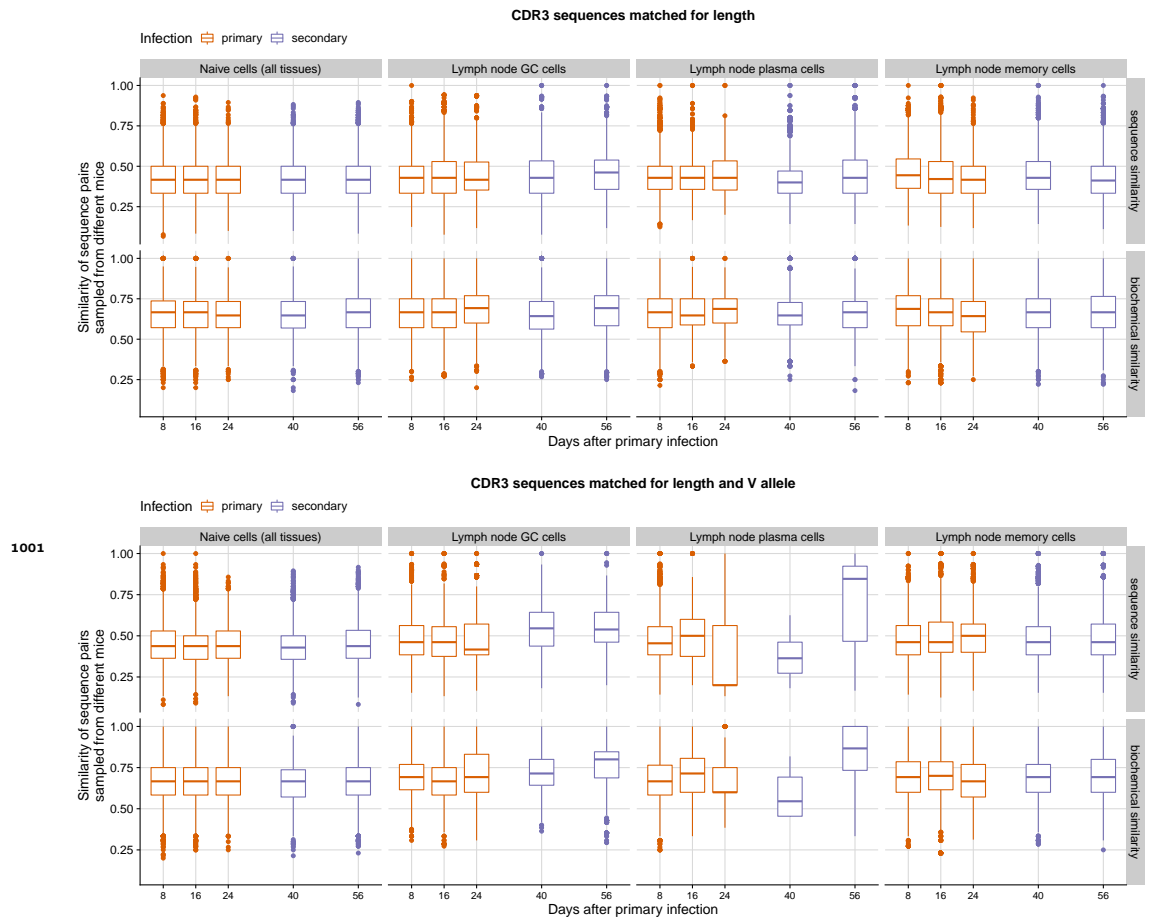

**Figure 3-Figure supplement 6.** Similarity of CDR3 sequence pairs sampled from different mice and matched for the same length (top) or the same length and the same V allele (bottom). Boxplots show the distribution across sequence pairs from all mouse pairs for each time point (separately for different cell types). Values that fall outside 1.5 times the inter-quartile range are shown as individual points.

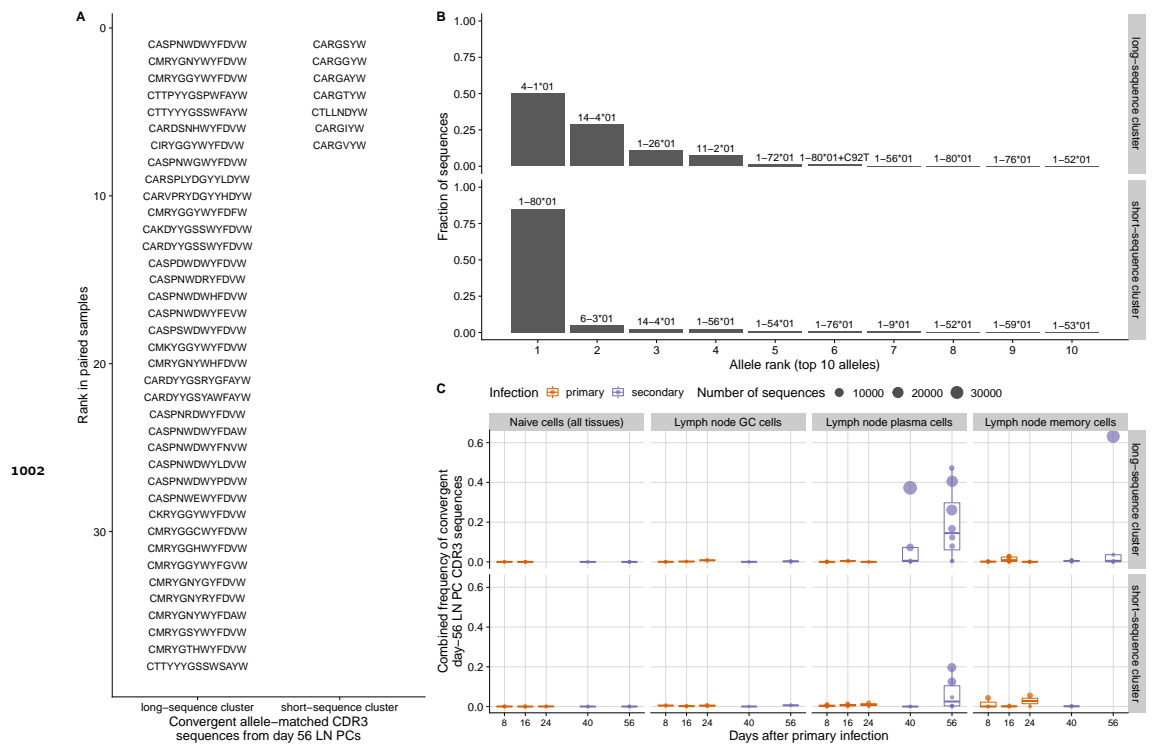

**Figure 3-Figure supplement 7.** (A) Convergent allele-matched CDR3 sequences from day 56 plasma cells of different mice. We included CDR3 sequences from pairs with 75% amino sequence similarity or higher. (B) the distribution of the heavy-chain V alleles used by those sequences in day 56 plasma cells (pooled across mice). (C) the combined frequency of the sequences in infected mice for all time points. Each point corresponds to an individual mouse.

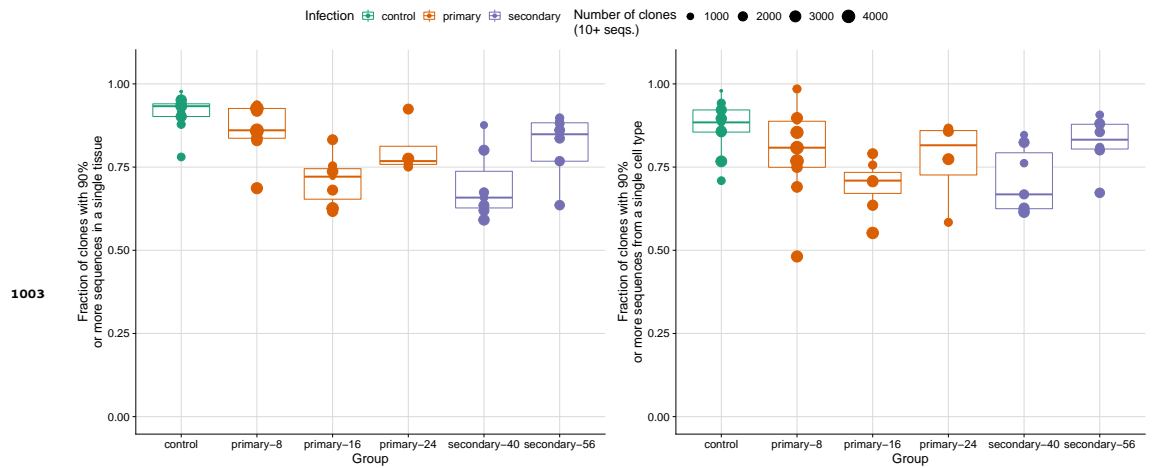

**Figure 3-Figure supplement 8.** Fraction of clones (with at least 10 reads) that have 90% or more reads from a single tissue (left) or 90% or more reads from a single cell type (right). Each point represents a mouse.

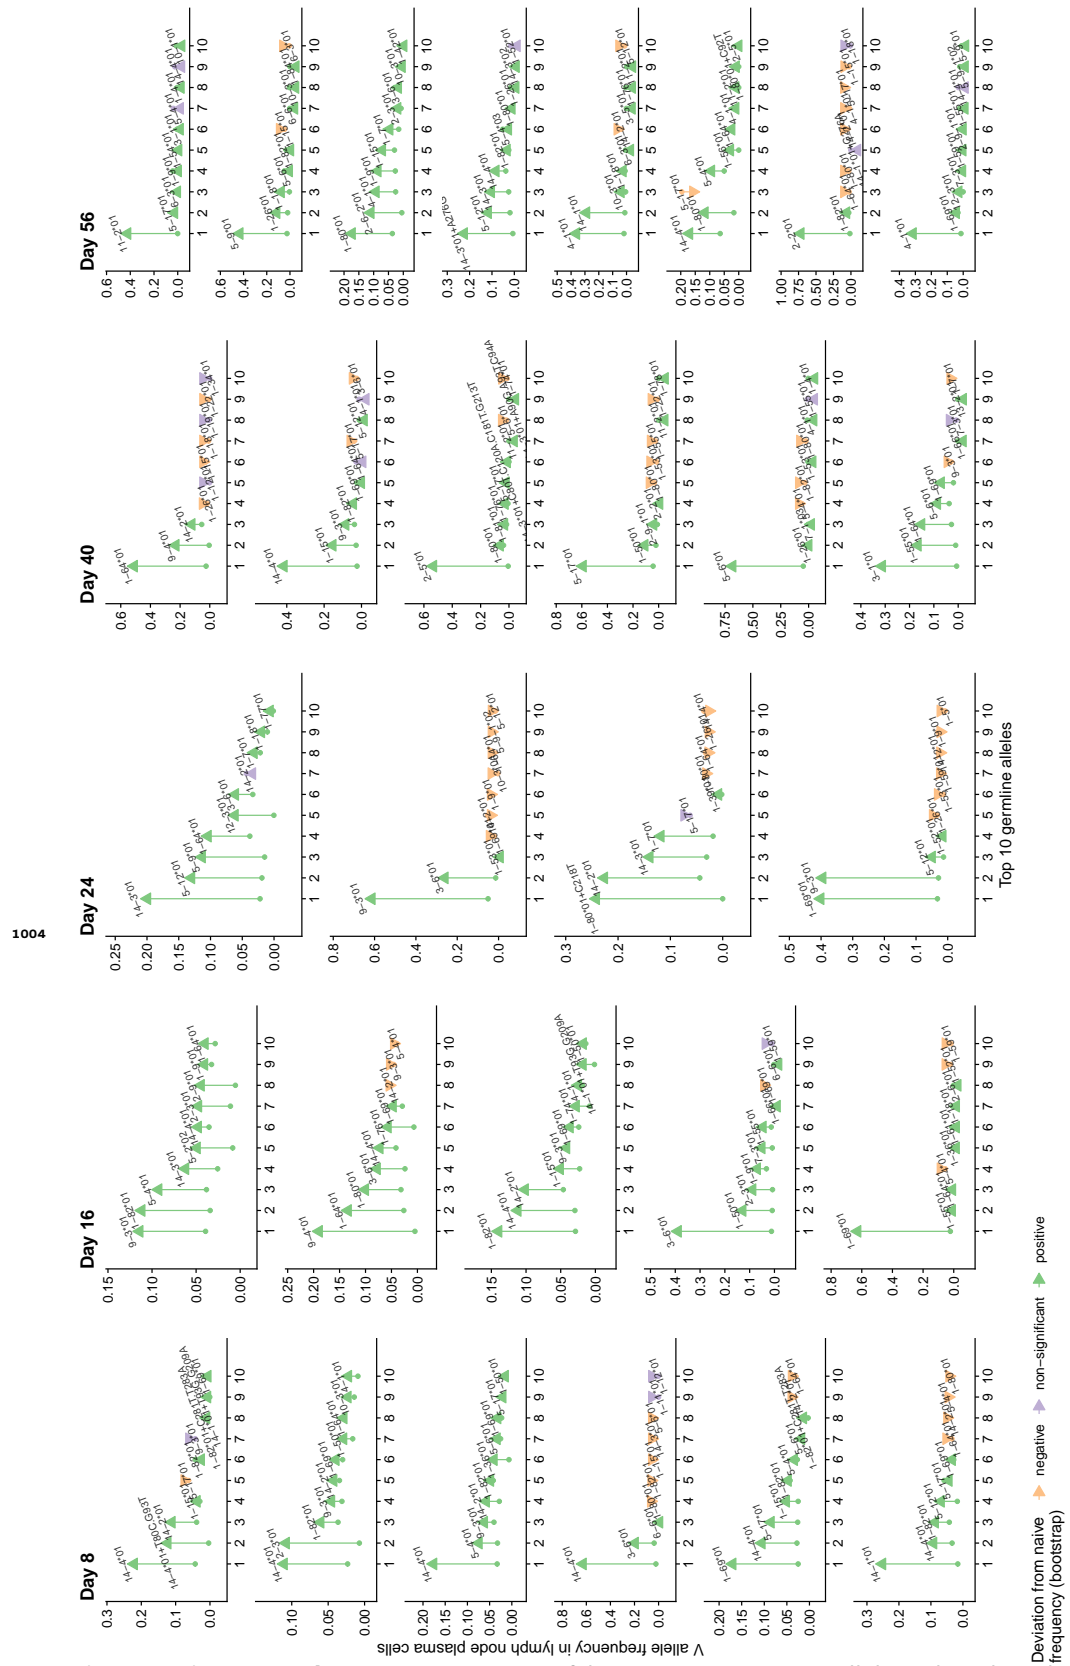

**Figure 4-Figure supplement 1.** Frequency of the 10 most common V alleles in lymph node plasma cells of infected mice. Each panel represents an individual mouse. The arrows go from each allele's frequency in the naive repertoire to its frequency in lymph node plasma cells. Mouse 40-7, which was sacrificed 8 days after the secondary infection, was considered a day-8 primary-infection mouse because it showed no signs of infection after the first inoculation and had ELISA titers similar to those of day-8 infected mice.



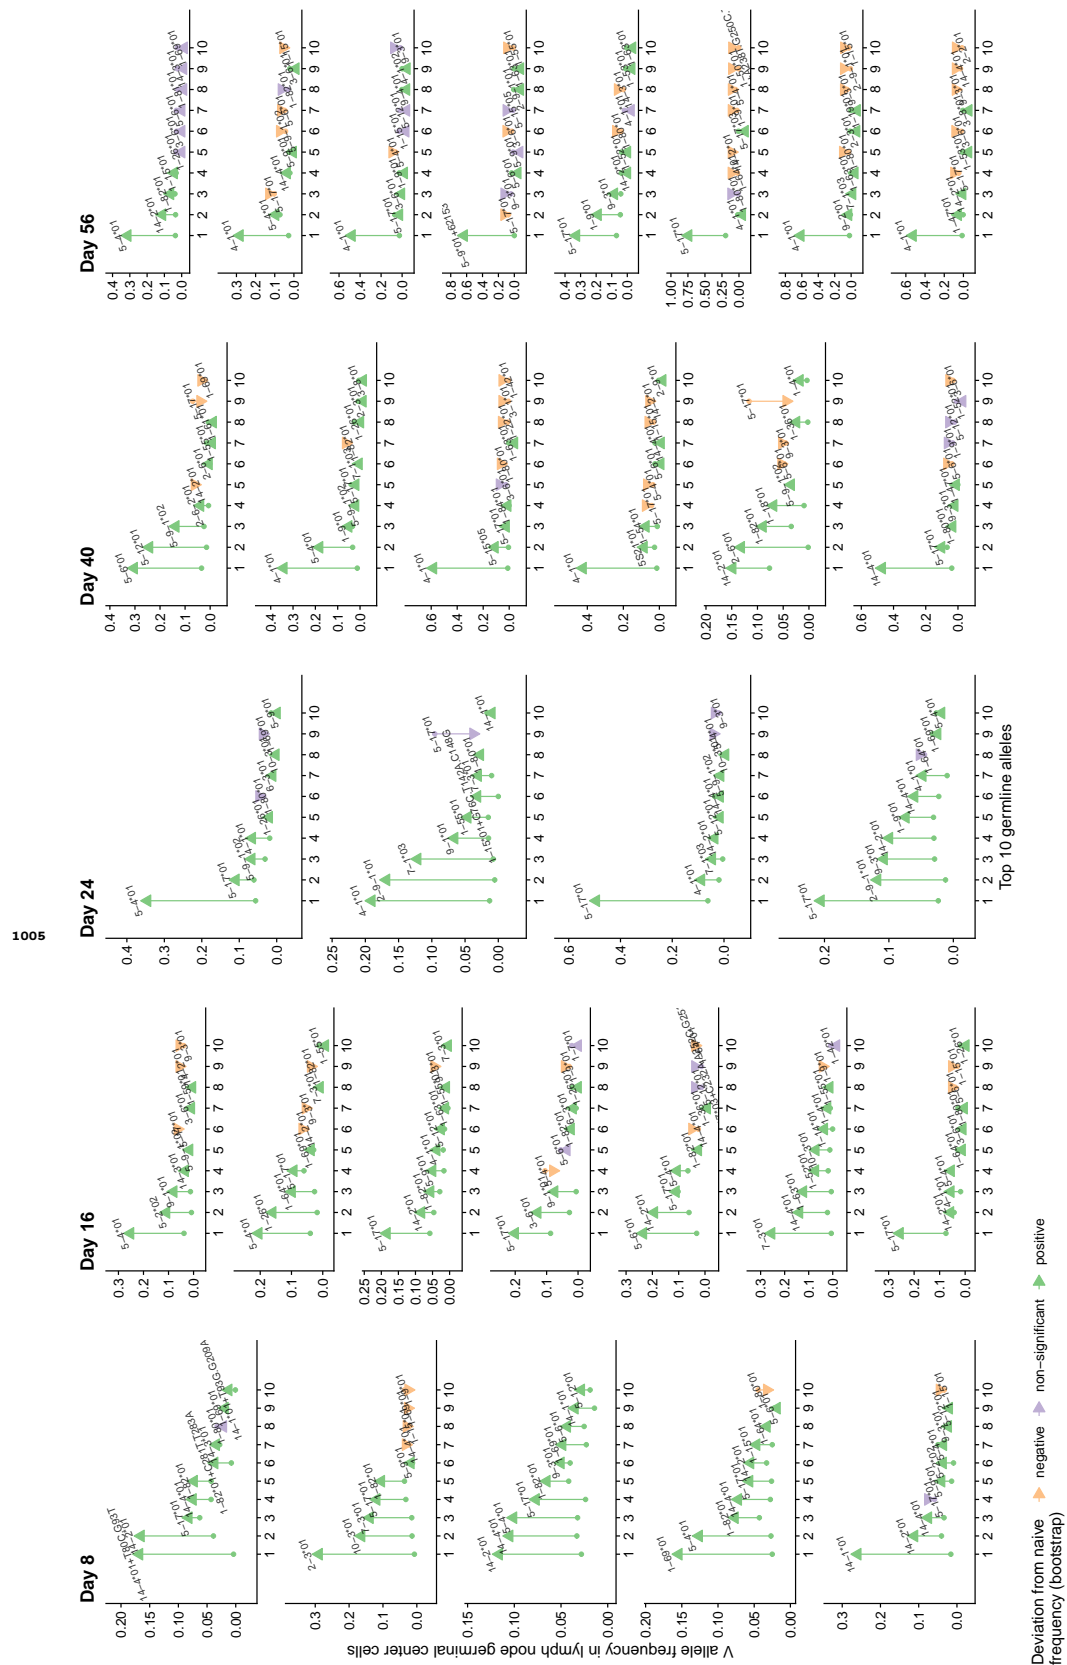

**Figure 4-Figure supplement 2.** Frequency of the 10 most common V alleles in lymph node germinal center cells of infected mice. Each panel represents an individual mouse. The arrows go from each allele's frequency in the naive repertoire to its frequency in lymph node plasma cells. Mouse 40-7, which was sacrificed 8 days after the secondary infection, was considered a day-8 primary-infection mouse because it showed no signs of infection after the first inoculation and had ELISA titers similar to those of day-8 infected mice.

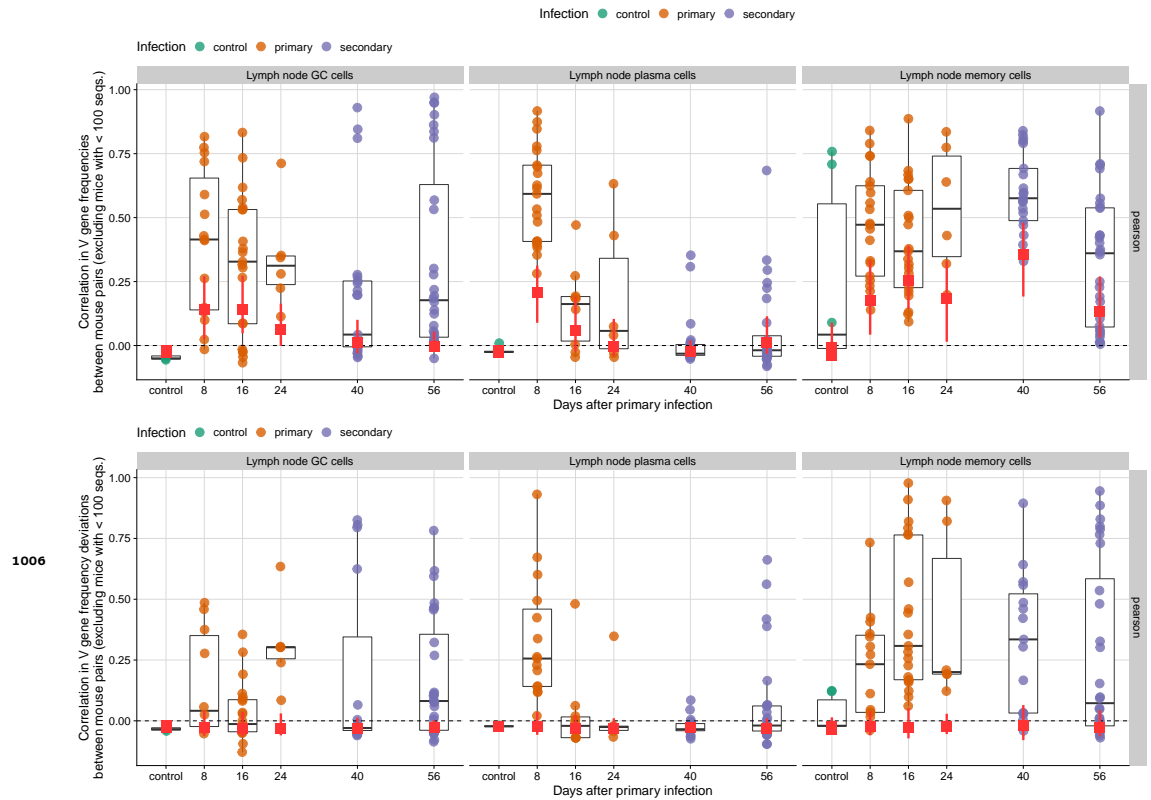

**Figure 4-Figure supplement 3.** Between-mouse correlations compared with a null model representing the effects of contingency. Each orange or purple point represents the observed correlation between single pair of mice, with boxplots summarizing the observed distributions. Red points and lines represent the median and the first and third quartiles of the distribution generated under the null model ( $n = 500$ ), which maintains the observed distribution of lineage sizes but randomly assigns each lineage a germline V allele based on allele frequencies in the naive repertoire. Null distributions were pooled across replicate realizations and mouse pairs. We computed correlations using Pearson's coefficient and measured frequency deviations as the ratio between a V allele's frequency in an influenza-induced population and its frequency in the naive repertoire.

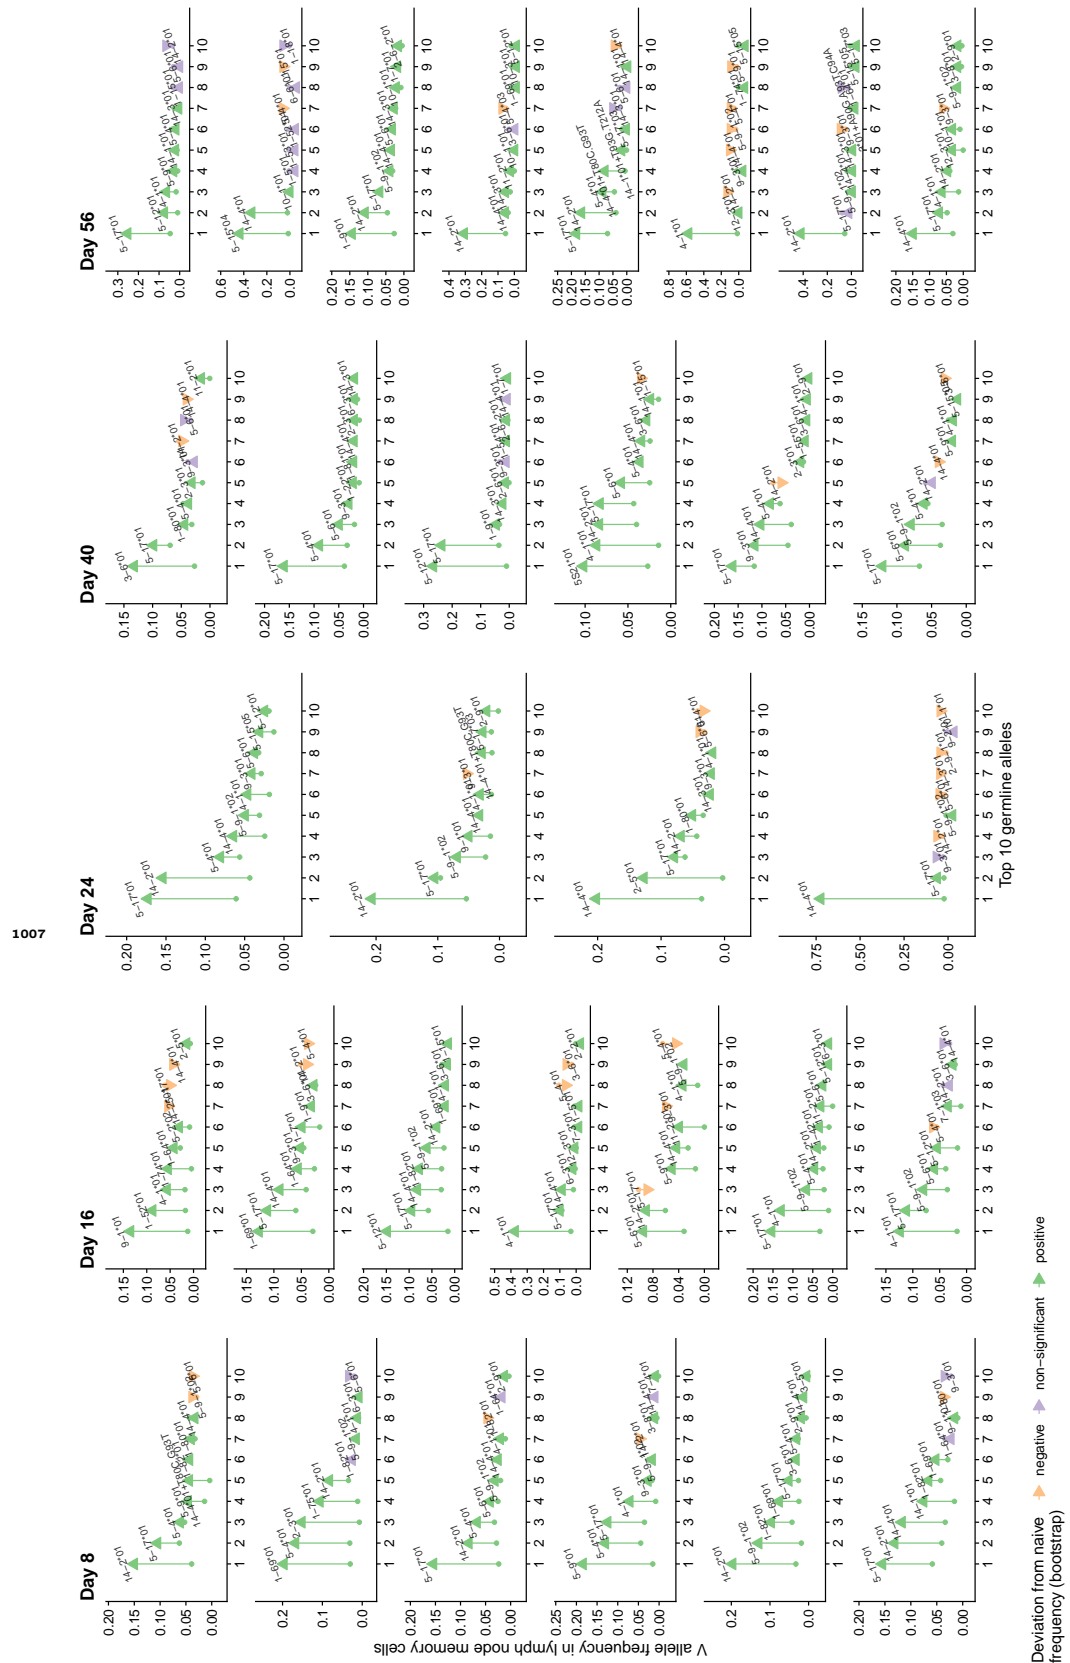

**Figure 4-Figure supplement 4.** Frequency of the 10 most common V alleles in lymph node memory cells of infected mice. Each panel represents an individual mouse. The arrows go from each allele's frequency in the naive repertoire to its frequency in lymph node plasma cells. Mouse 40-7, which was sacrificed 8 days after the secondary infection, was considered a day-8 primary-infection mouse because it showed no signs of infection after the first inoculation and had ELISA titers similar to those of day-8 infected mice.

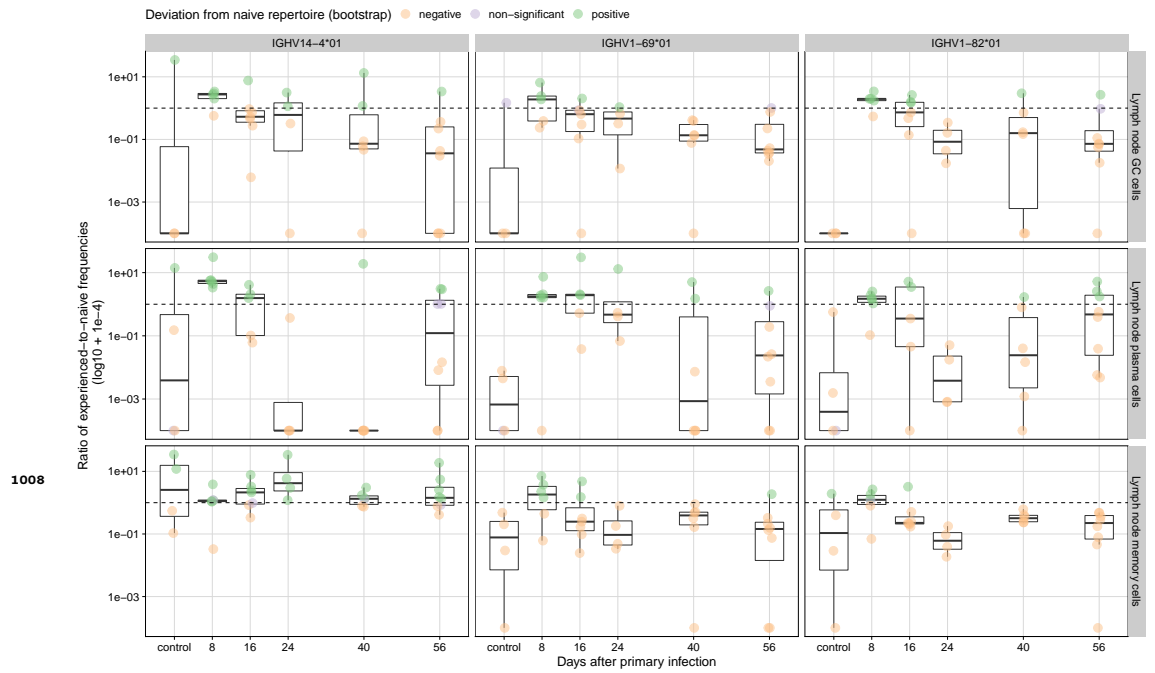

**Figure 4-Figure supplement 5.** Frequency deviations from the naive repertoire for germline heavy-chain V alleles IGHV14-4\*01, IGHV1-82\*01 and IGHV1-69\*01 at different time points and in different cell types. We measured frequency deviations as the ratio of the experienced-to-naive frequencies in each population. Each point represents a mouse with at least 100 sequences sampled from the corresponding experienced population and from the naive repertoire. Deviations from the naive repertoire are colored based on whether they are different from a null distribution obtained by bootstrapping experienced frequencies from the naive repertoire ( $n = 500$  replicates) based on a 95% confidence interval test.

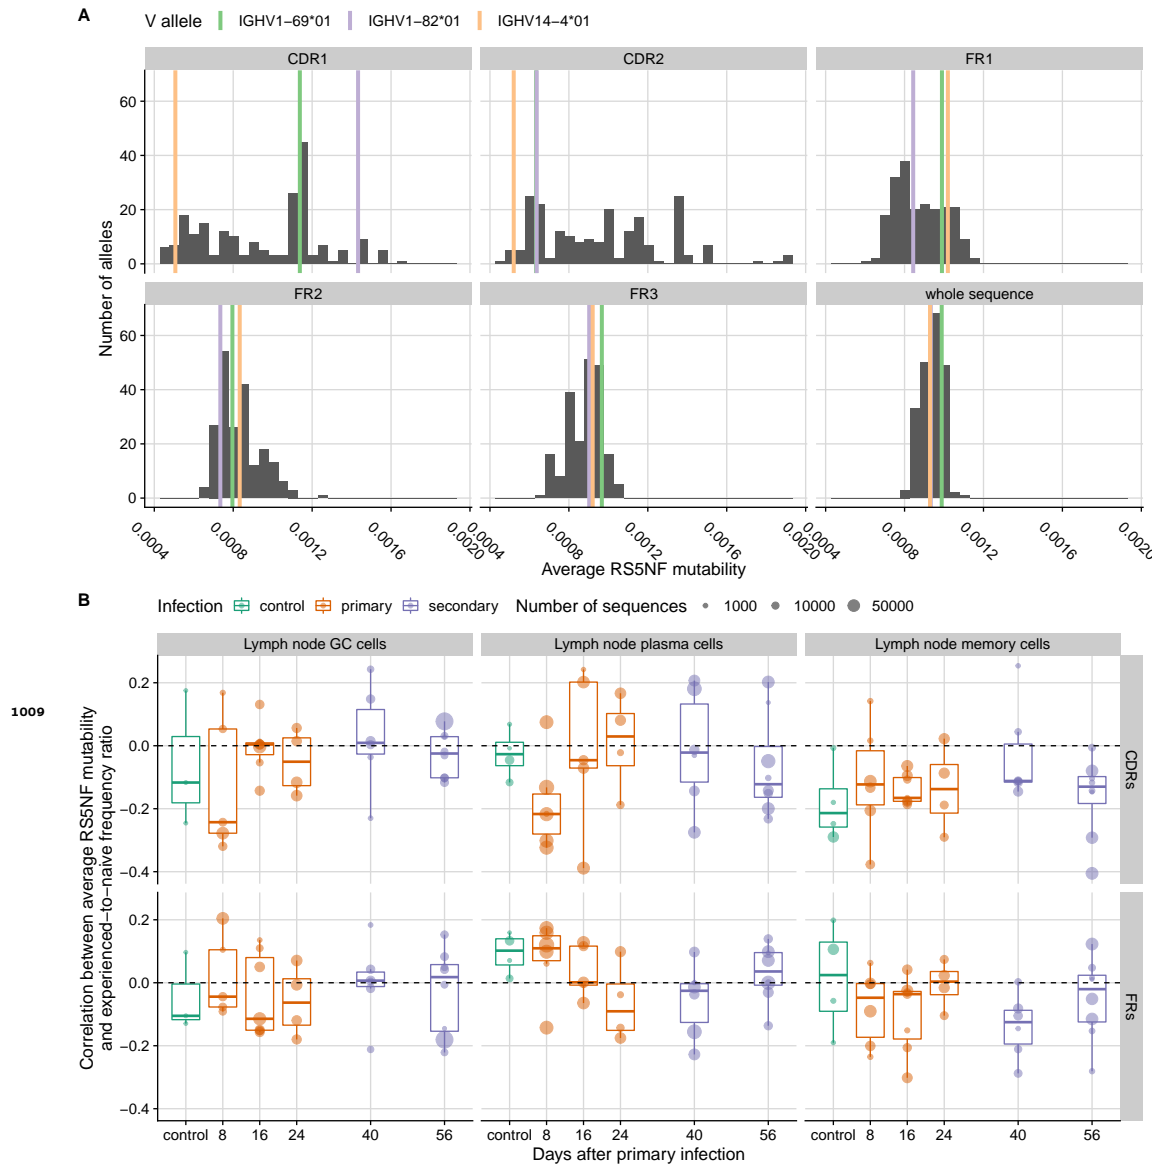

**Figure 4-Figure supplement 6.** Distribution of predicted mutability across V alleles (**A**), and correlations between predicted mutability and their frequency deviations from the naive repertoire (**B**). For each framework region (FR) and complementarity-determining region (CDR), we computed the average RS5NF mutability score from *Cui et al. 2016* across all 5-nucleotide motifs. In **B**, we computed an average across FRs weighed by the length of each FR, and similarly for CDRs. Each circle represents a mouse with at least 100 sequences each in the naive and experienced populations. Correlations were measured used Pearson's coefficient.

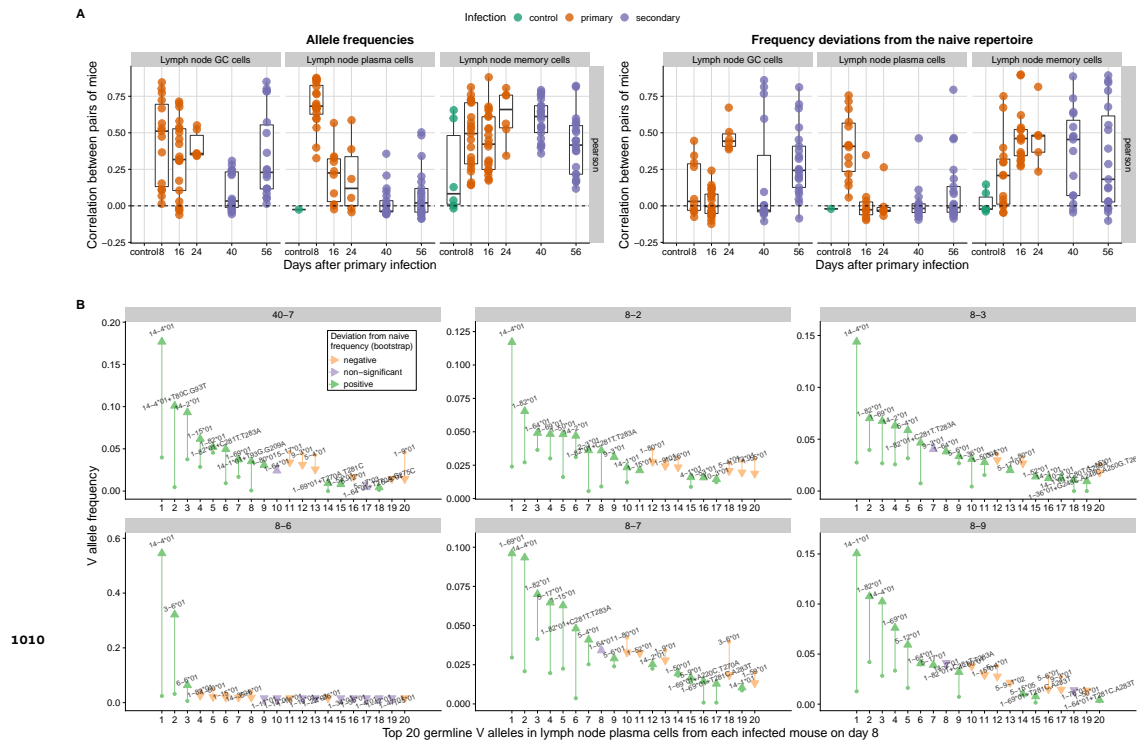

**Figure 4-Figure supplement 7.** Pairwise correlations between mice after collapsing identical reads from the same mouse, tissue, cell type and isotype. **(A)** Distribution of pairwise correlations at each time point. Each point represents a pair of mice with at least 100 reads each in the respective B cell population. We computed correlations using Pearson's coefficient and measured frequency deviations as the ratio between a V allele's frequency in an influenza-induced population and its frequency in the naive repertoire. **(B)** Frequency of the 20 most common V alleles in the lymph node plasma cells of each mouse 8 days after primary infection. Each panel represents an individual mouse. The arrows go from each allele's frequency in the naive repertoire to its frequency in lymph node plasma cells. Each allele was labelled as significantly over- or underrepresented in each mouse if the ratio of its experienced and naive frequencies was outside a 95% confidence interval obtained by bootstrap sampling ( $n = 500$ ) of experienced frequencies from the naive repertoire (preserving the observed total number of sequences in each mouse). Mouse 40-7, which was sacrificed 8 days after the secondary infection, was considered a day-8 primary-infection mouse because it showed no signs of infection after the first inoculation and had ELISA titers similar to those of day-8 infected mice.

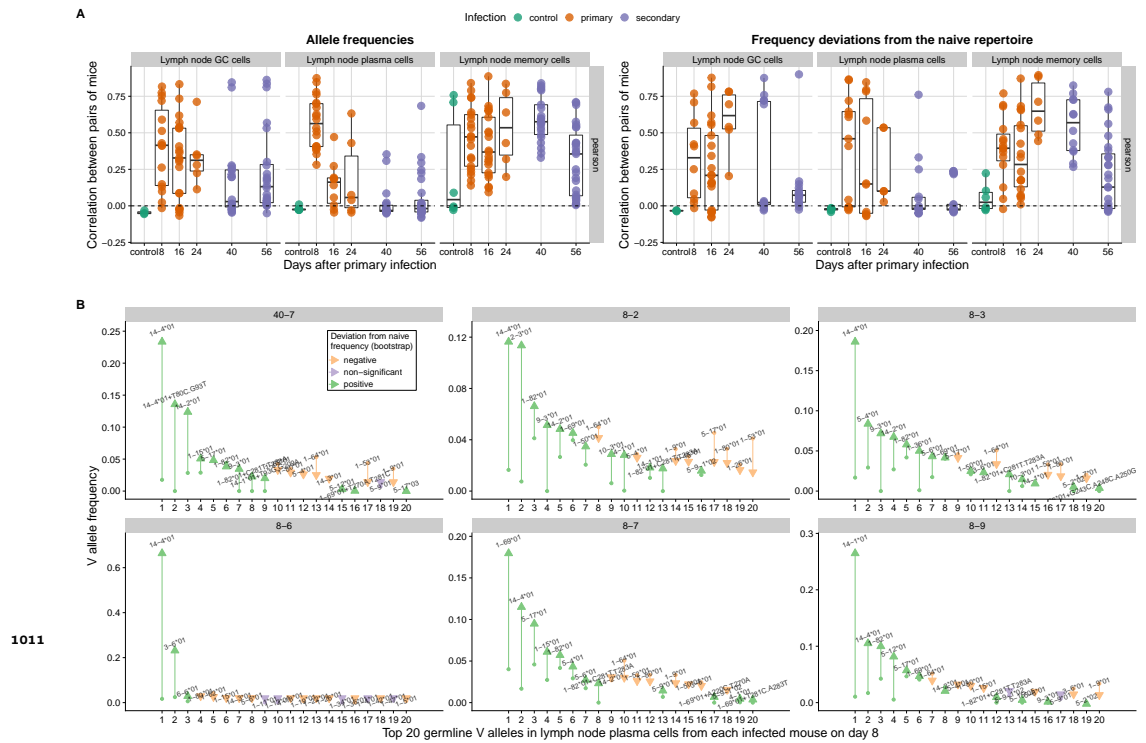

**Figure 4-Figure supplement 8.** Pairwise in lymph correlations between mice using an alternative dataset (*Greiff et al., 2017*) to estimate germline allele frequencies in the naive repertoire. **(A)** Distribution of pairwise correlations at each time point. Each point represents a pair of mice with at least 100 reads each in the respective B cell population. We computed correlations using Pearson's coefficient and measured frequency deviations as the ratio between a V allele's frequency in an influenza-induced population and its frequency in the naive repertoire. **(B)** Frequency of the 20 most common V alleles in the lymph node plasma cells of each mouse 8 days after primary infection. Each panel represents an individual mouse. The arrows go from each allele's frequency in the naive repertoire to its frequency in lymph node plasma cells. Each allele was labelled as significantly over- or underrepresented in each mouse if the ratio of its experienced and naive frequencies was outside a 95% confidence interval obtained by bootstrap sampling ( $n = 500$ ) of experienced frequencies from the naive repertoire (preserving the observed total number of sequences in each mouse). Mouse 40-7, which was sacrificed 8 days after the secondary infection, was considered a day-8 primary-infection mouse because it showed no signs of infection after the first inoculation and had ELISA titers similar to those of day-8 infected mice.
